# Supplementary material for: Schistosome W-Linked Genes Inform Temporal Dynamics of Sex Chromosome Evolution and Suggest Candidate for Sex Determination
Source: PubMed Central journal article supplement (PMC8662593; doi:10.1093/molbev/msab178), 2021-06-19
Supplement: msab178_supplementary_data.pdf [file msab178_supplementary_data.pdf]

# SUPPLEMENTARY MATERIALS

---

## 1. Supplementary Datasets

All supplementary datasets are available at

<https://seafiler.ist.ac.at/d/2d9ce33a4e0c45aeadd1/>

**Dataset 1:** Assembly of candidate W transcripts - *S. mansoni* (“original”)

**Dataset 2:** Assembly of candidate W transcripts - *S. mansoni* (“combined”, includes annotated W genes)

**Dataset 3:** Assembly of candidate W transcripts - *S. japonicum*

**Dataset 4:** ZW pairs dN/dS table

**Dataset 5:** Strata assignment table

**Dataset 6:** *S. japonicum* genome  $F_{ST}$

**Dataset 7:** CNV analysis: control-FREEC outputs

**Dataset 8:** CNV analysis: *S. japonicum* - *S. mansoni* one-to-one orthologs

**Dataset 9:** CNV analysis: final table with gene loss

**Dataset 10:** ZW/ZZ dN/dS

**Dataset 11:** Gene expression - *S. mansoni*

**Dataset 12:** Gene expression - *S. japonicum*

**Dataset 13:** Annotation files - *S. mansoni*

**Dataset 14:** Annotation files - *S. japonicum*

**Dataset 15:** *S. japonicum* male and female transcriptomes

**Dataset 16:** Curated Kallisto transcriptomes

**Dataset 17:** Orthofinder tables

**Dataset 18:** Curated Orthofinder transcriptomes

## 2. Supplementary Figures

**Supplementary Figure 1.** Flow chart of the k-mer pipeline we implemented using the BMAP package.

**Supplementary Figure 2.** Flow chart of the steps we followed to filter the *S. mansoni* W-candidates after assembling the output of the k-mer pipeline.

**Supplementary Figure 3.** Flow chart of the steps we followed to filter the *S. japonicum* W-candidates after assembling the output of the k-mer pipeline.

**Supplementary Figure 4.** Identifying the sex of the miracidium samples used as population data to estimate  $F_{ST}$  between the male and female *S. japonicum*.

**Supplementary Figure 5.** Calculated FST for the different chromosomes and chromosomal regions of the sex-chromosomes in *S. japonicum*.

**Supplementary Figure 6.** Heatmap of the expression (TPM) of the final set of protein-coding *S. mansoni* W-candidates in males and females of different developmental stages.

**Supplementary Figure 7.** Heatmap of the expression (TPM) of the final set of the *S. japonicum* W-candidates in males and females.

**Supplementary Figure 8.** Boxplots comparing the expression (TPM) of *S. mansoni* W-candidates and their Z-homolog using an alternative RNA dataset

**Supplementary Figure 9.** Boxplots of the log2-transformed W-to-Z ratio of expression for *S. japonicum* for all the candidates across 8 developmental timepoints.

**Supplementary Figure 10.** Boxplots of the log2-transformed paired W/Z expression for *S. mansoni* for all the candidates across 5 developmental stages (study PRJNA343582)

**Supplementary Figure 11.** Boxplots of the log2-transformed paired W/Z expression for *S. mansoni* for all the candidates for unpaired immature adults and paired mature adults using an alternative RNA dataset (study PRJEB1237).

**Supplementary Figure 12.** Evolution and expression of the shared S0 gene ANKHD1 and Uev.

**Supplementary Figure 13.** Quality assessment of *S. japonicum* male and female transcriptome assemblies used in the process of improving the assembly of *S. japonicum* candidate W transcripts.

**Supplementary Figure 14.** Determination of *S. mansoni* Z-specific regions.

**Supplementary Figure 15.** Bioinformatic steps followed to produce the reference transcriptomes used for the Kallisto and OrthoFinder analyses.

### 3. Supplementary Tables

**Supplementary Table 1.** Publicly available DNA/RNA-seq libraries used in the different sections.

**Supplementary Table 2.** Publicly available assemblies used in the study.

**Supplementary Table 3.** Number of CNVs (loss) in female *S. japonicum*, depending on the genomic location.

**Supplementary Table 4.** Expression P-values (Kruskal-Wallis rank sum test) for comparisons of the strata specific expression of *S. mansoni* (using the z-homologs) (study PRJNA343582).

**Supplementary Table 5.** Expression P-values (Kruskal-Wallis rank sum test) for comparisons of the strata specific expression *S. japonicum* (using the z-homologs) (study PRJNA312093).

**Supplementary Table 6.** Expression P-values (Kruskal-Wallis rank sum test) for comparisons of the strata specific expression of *S. mansoni* (using the z-homologs) (study PRJEB1237).

**Supplementary Table 7.** *De novo* evolutionary strata coordinates.

## 4. Supplementary Code

**Supplementary Code 1:** Generic k-mer pipeline to detect and assemble W-transcripts from male and female DNA and RNA sequencing data

**Supplementary Code 2:** *S. mansoni* k-mer based identification and assembly of candidate W-derived transcripts

**Supplementary Code 3:** *S. japonicum* k-mer based identification and assembly of candidate W-derived transcripts

**Supplementary Code 4:** Strata Identification

**Supplementary Code 5:** A description of the process we followed to perform the FST analysis, from identifying the sex of the Miracidia samples to calculating FST

**Supplementary Code 6:** CNV analysis with control-FREEC

**Supplementary Code 7:** Estimating the Rates of Evolution of ZW homologs in *S. mansoni*

**Supplementary Code 8:** Estimating the Rates of Evolution of ZW homologs in *S. japonicum*

**Supplementary Code 9:** *S. mansoni* Transcriptome Curation for OrthoFinder

**Supplementary Code 10:** *S. japonicum* Transcriptome Curation for OrthoFinder

**Supplementary Code 11:** Running OrthoFinder

**Supplementary Code 12:** *S. mansoni* transcriptome curation for Kallisto

**Supplementary Code 13:** *S. japonicum* transcriptome curation for Kallisto

**Supplementary Code 14:** Expression analysis with Kallisto

## 2. Supplementary Figures

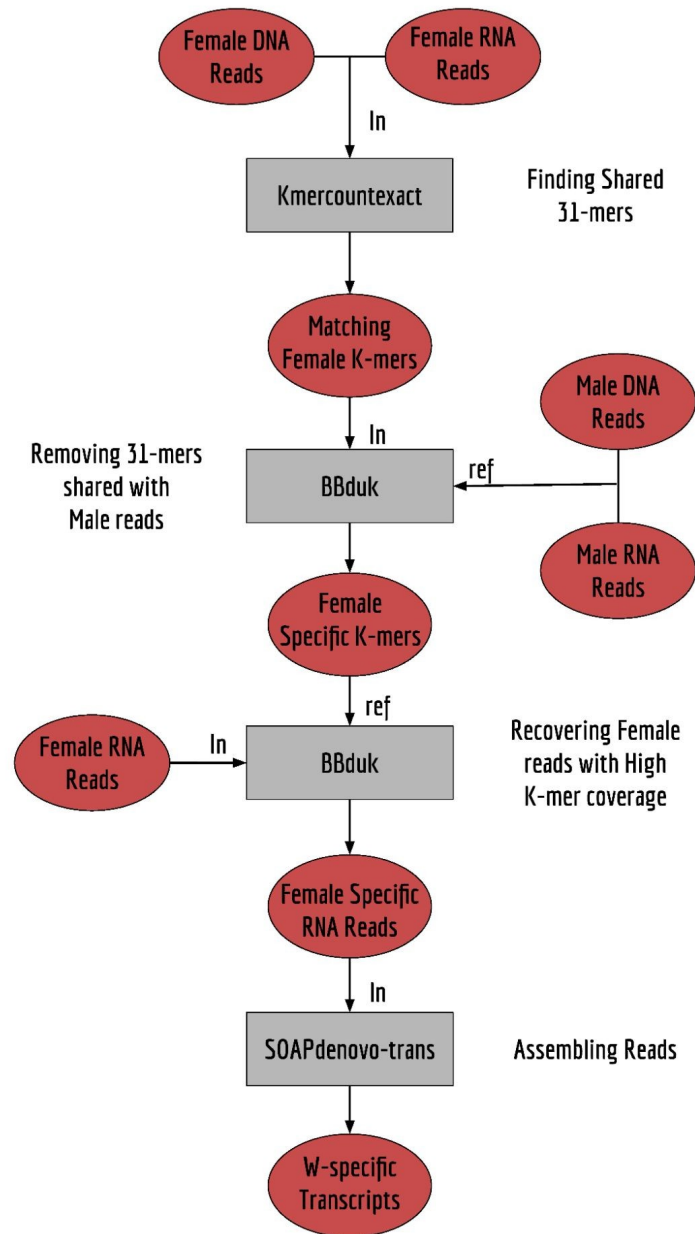

**Supplementary Figure 1.** Flow chart of the k-mer pipeline we implemented using the BBMap package. It has been similarly applied in both species.

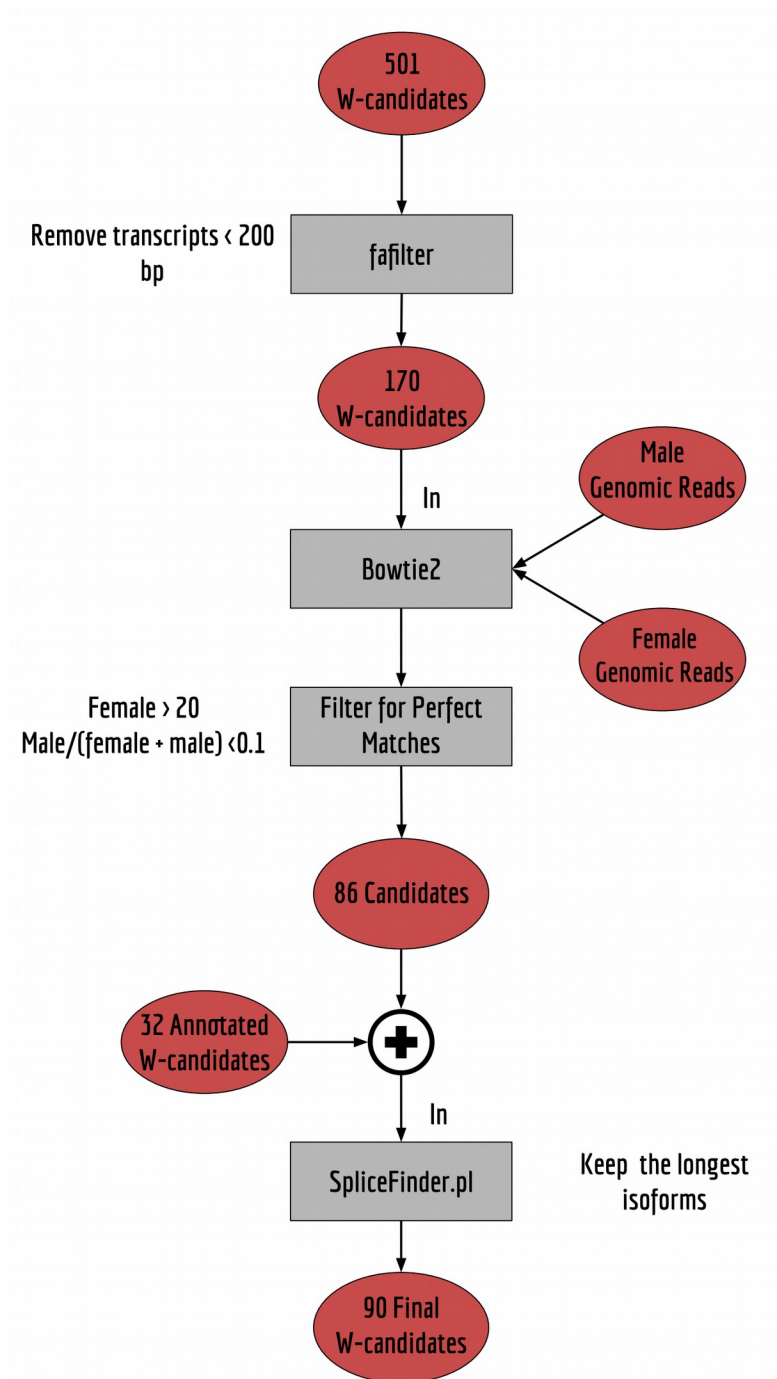

**Supplementary Figure 2.** Flow chart of the steps we followed to filter the *S. mansoni* W-candidates after assembling the output of the k-mer pipeline.

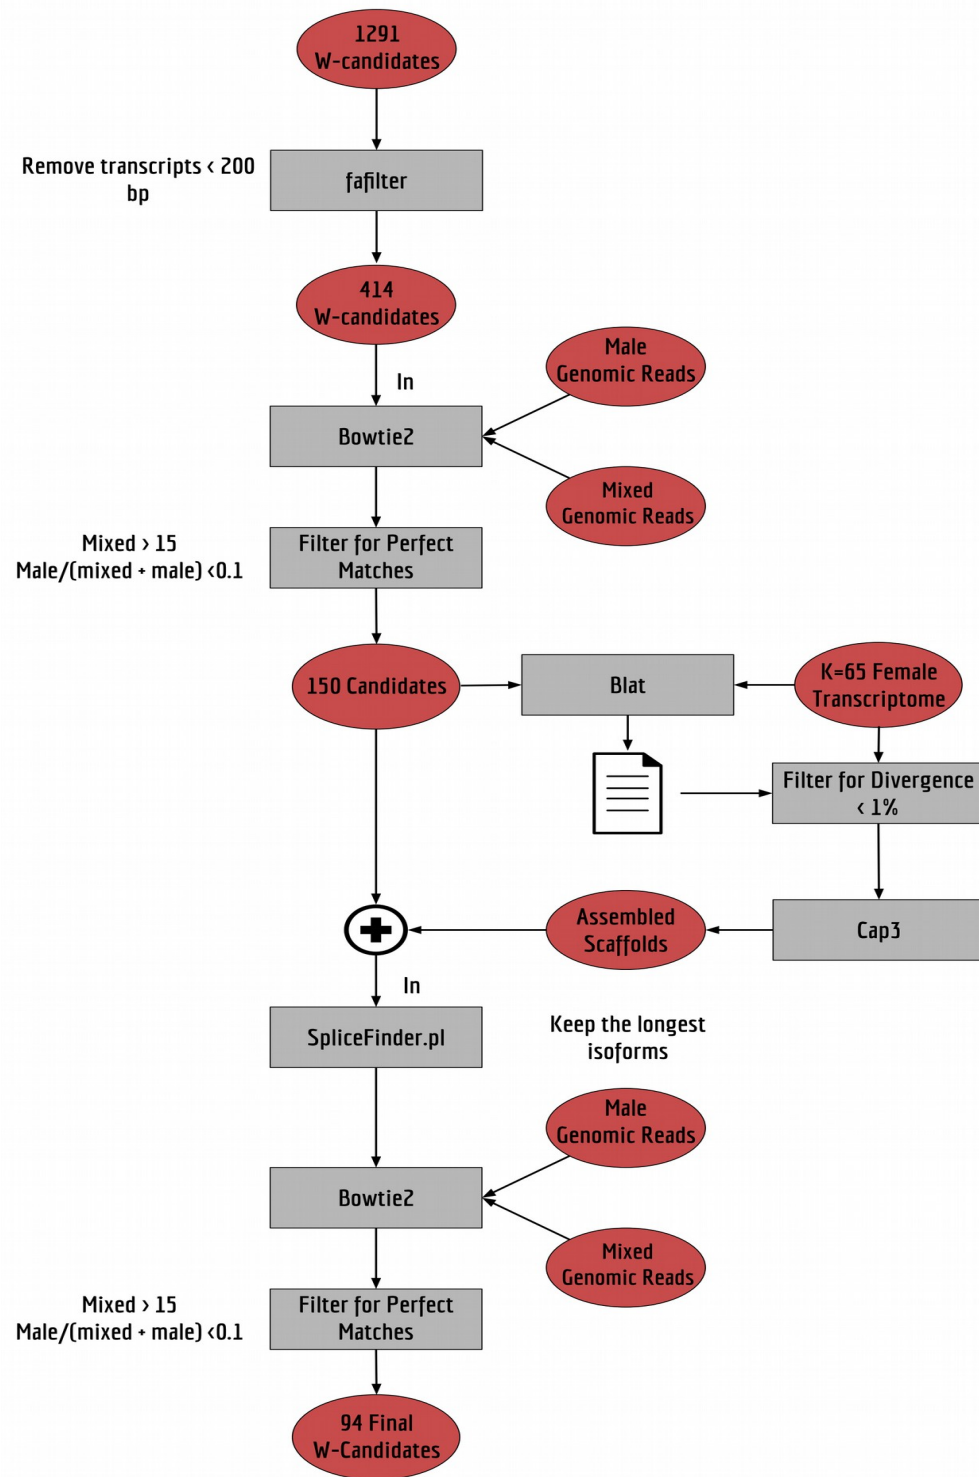

**Supplementary Figure 3.** Flow chart of the steps we followed to filter the *S. japonicum* W-candidates after assembling the output of the k-mer pipeline.

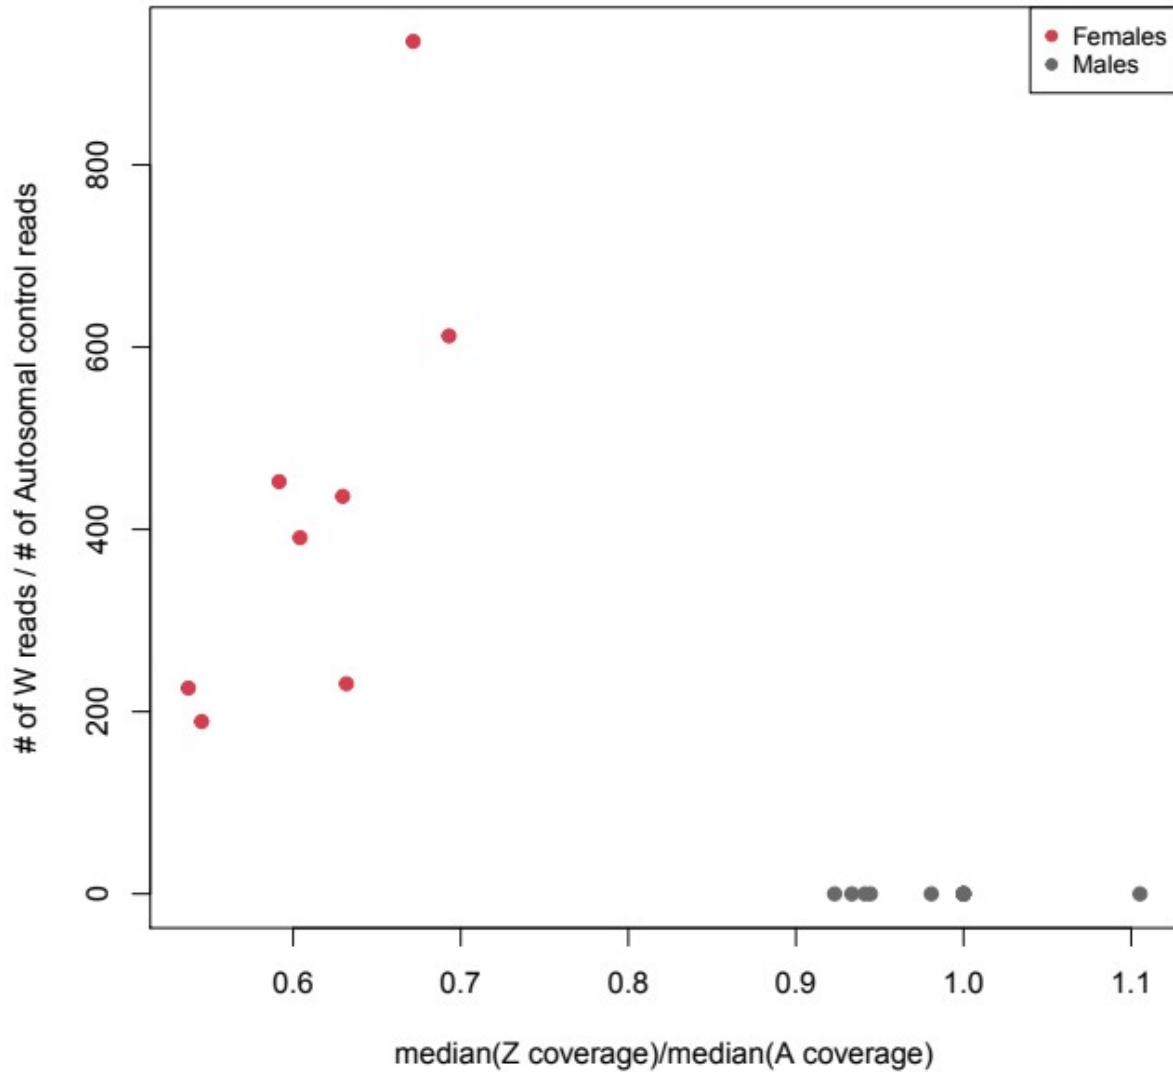

**Supplementary Figure 4. Identifying the sex of the miracidium samples used as population data to estimate  $F_{ST}$  between the male and female *S. japonicum*.** The x-axis shows the ratio of the median Z genomic coverage to the median autosomal “A” coverage (expected to be distributed around 1 for males and 0.5 for females). The y-axis represents the ratio of the number of reads that mapped perfectly to W-candidates (expecting many reads in females, but no reads in males) to the number that mapped to 3 autosomal controls (expecting the same number of reads in both sexes).

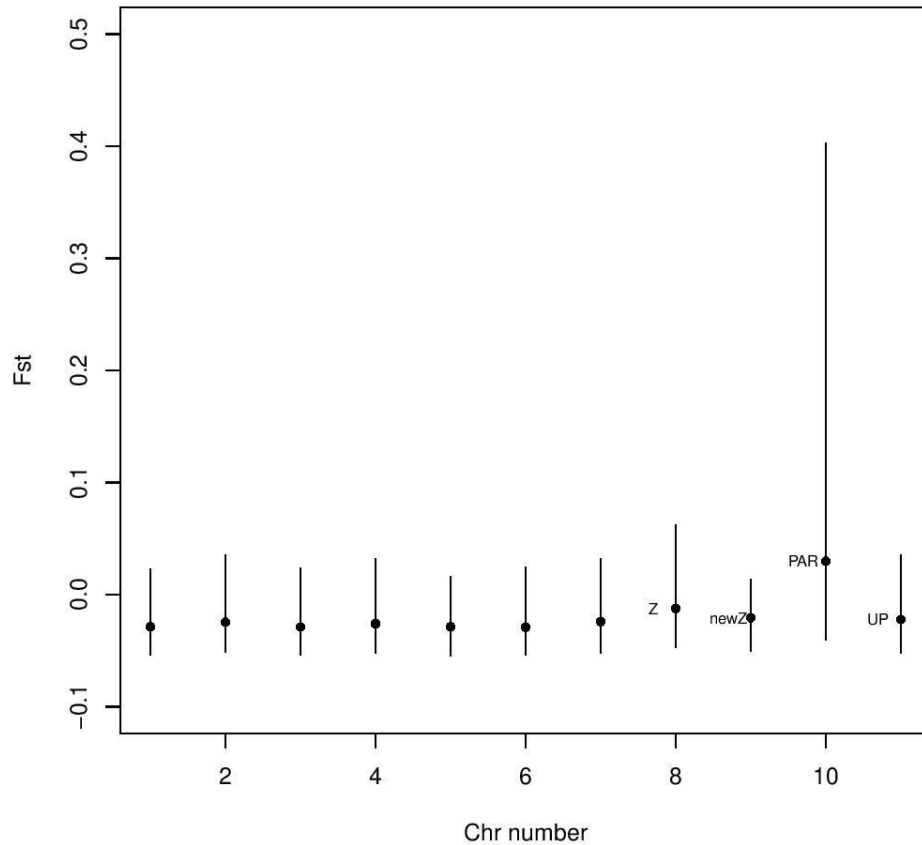

**Supplementary Figure 5. Calculated  $F_{ST}$  between males and females, for the different chromosomes and chromosomal regions of the sex-chromosomes in *S. japonicum*.** The plot shows high  $F_{ST}$  in the pseudoautosomal region (PAR), which is consistent with a young stratum. The different regions of the sex chromosomes correspond to assignment previously published in Picard *et al.* 2018: Z and newZ stand respectively for previously known and newly identified Z-specific regions, UP corresponds to unplaced scaffolds.



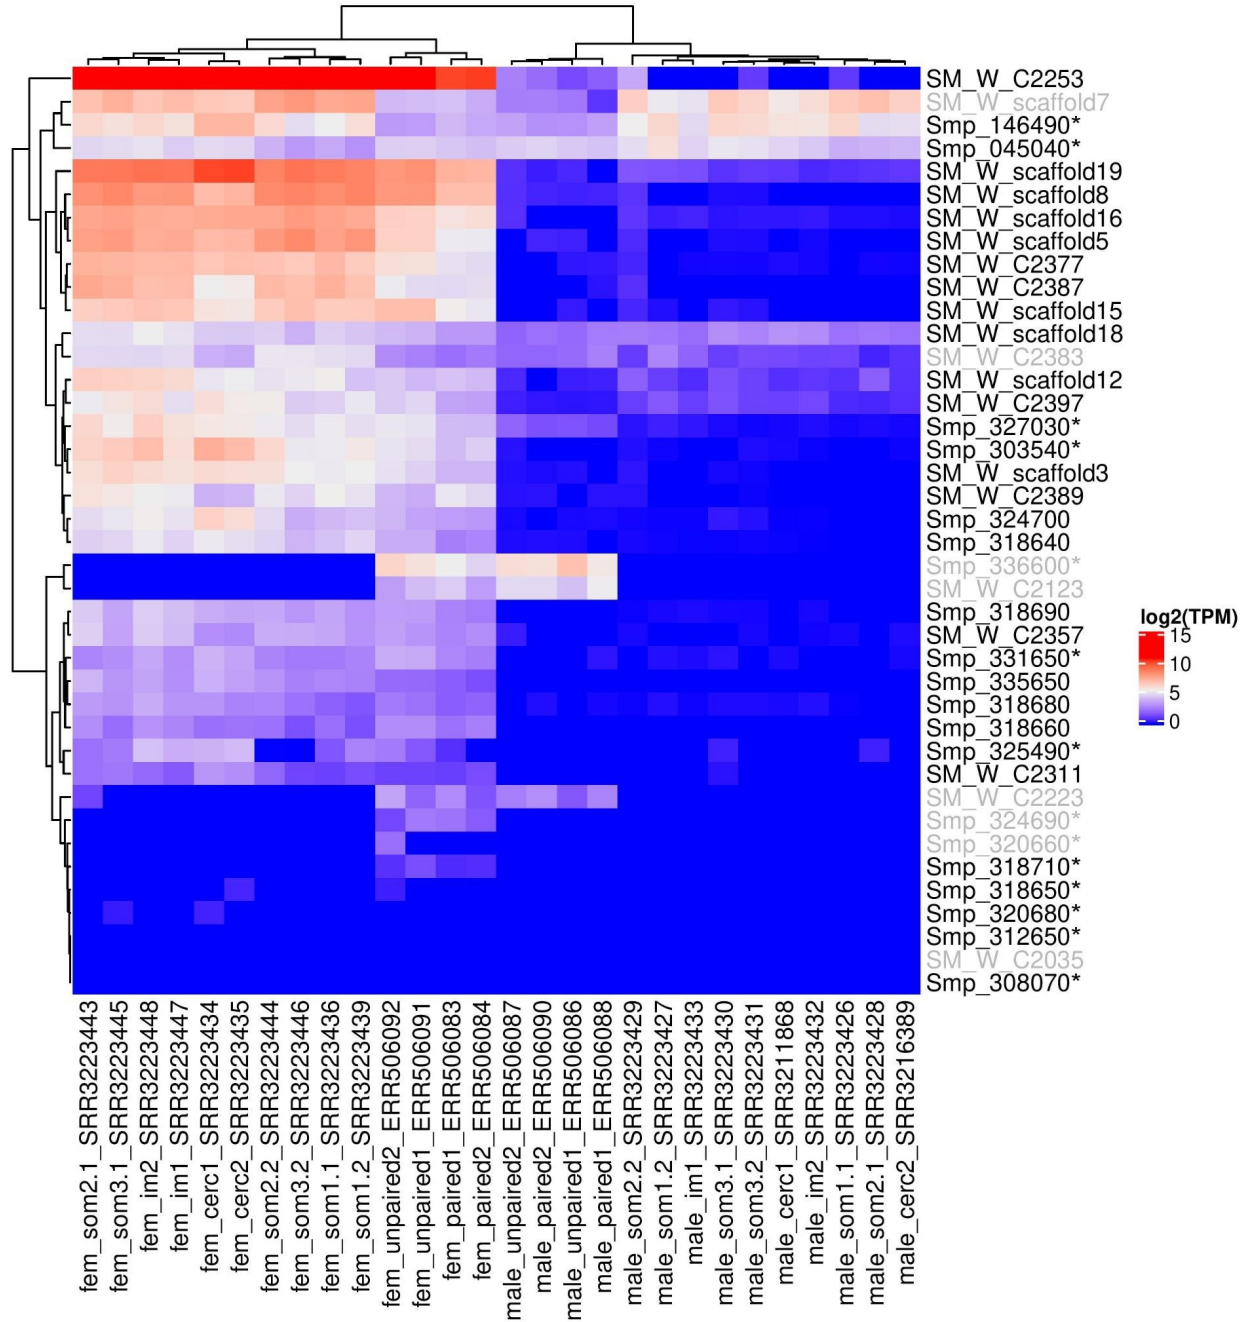

**Supplementary Figure 6. Heatmap of the expression (TPM) of the final set of protein-coding *S. mansoni* W-candidates in males and females of different developmental stages.** The candidates in grey did not have values in the dN/dS table (suggesting that they were short and/or extremely similar to their Z-homolog, making inferences of W-specific expression difficult), and the candidates with an asterisk are the annotated candidates which were not identified by the k-mer pipeline. Only transcripts longer than 200 bp are included in this figure.

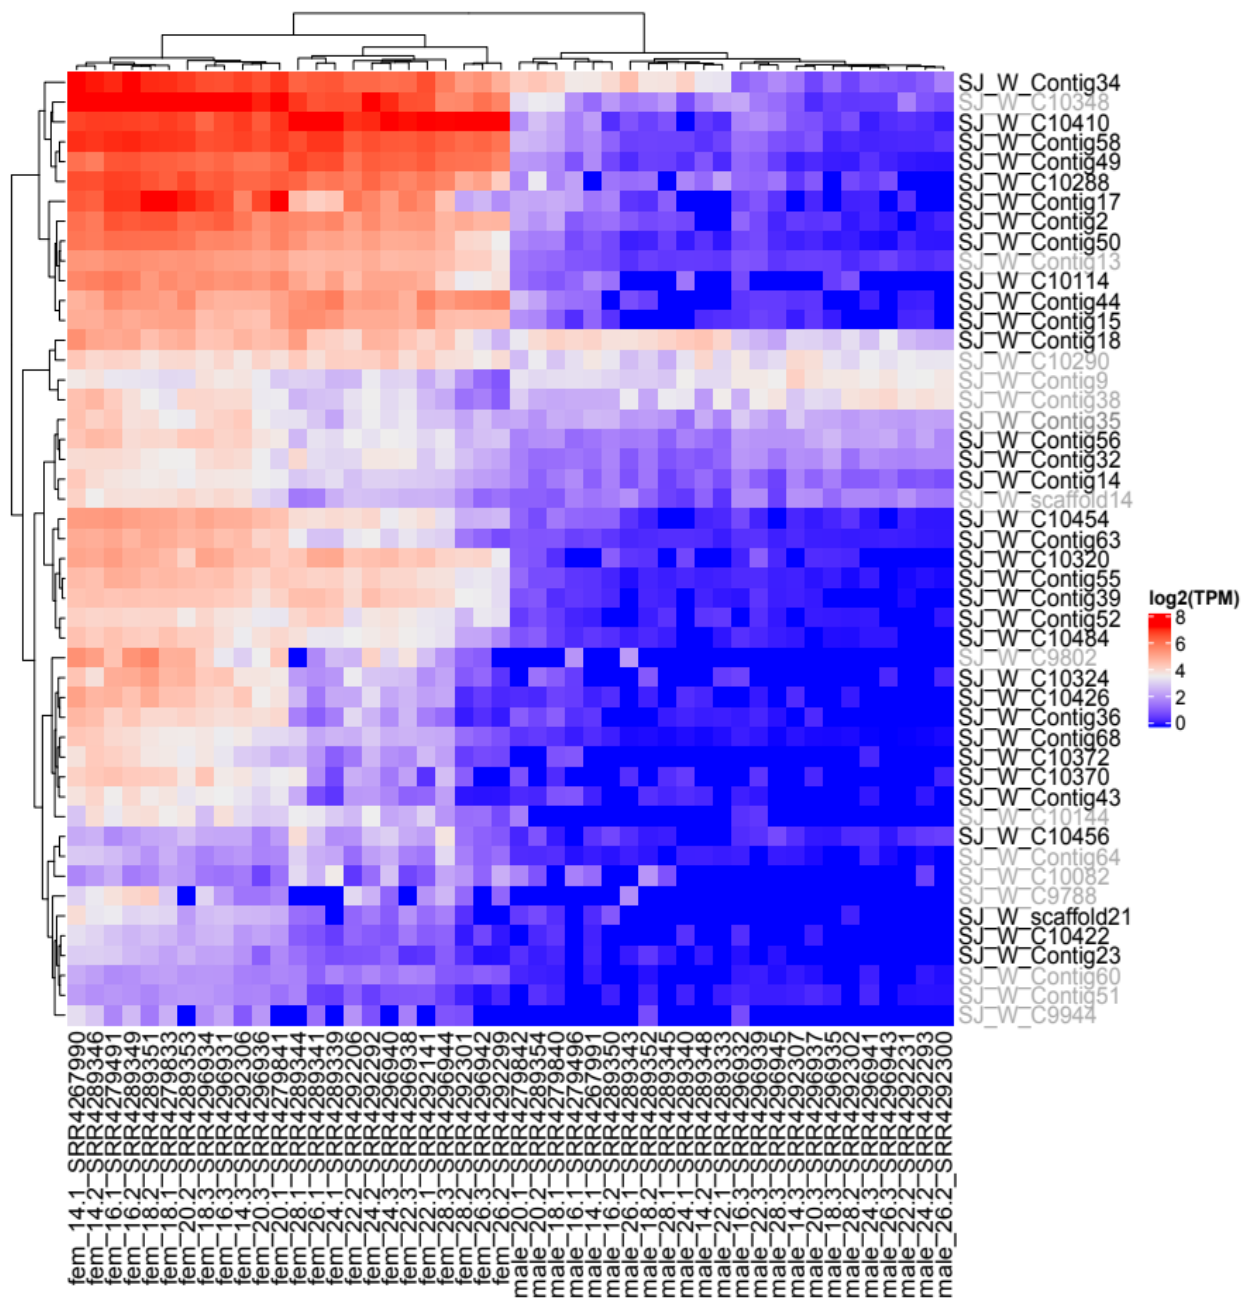

**Supplementary Figure 7. Heatmap of the expression (TPM) of the final set of the *S. japonicum* W-candidates in males and females.** The candidates in grey did not have values in the dN/dS table (suggesting that they were short and/or extremely similar to their Z-homolog, making inferences of W-specific expression difficult). Only transcripts longer than 200 bp are included in this figure.

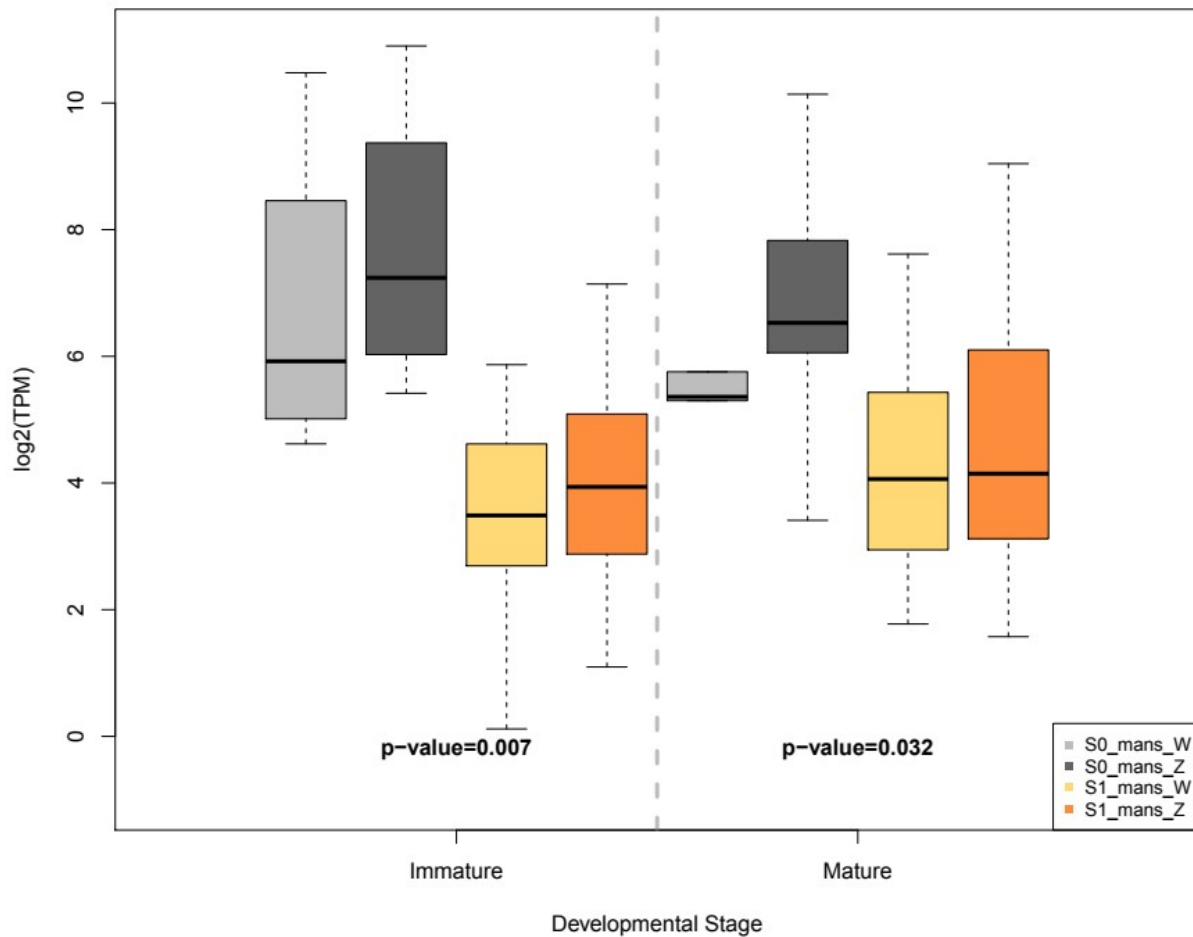

**Supplementary Figure 8. Boxplots comparing the expression (TPM) of *S. mansoni* W-candidates and their Z-homolog using an alternative RNA dataset** TPM values were estimated from RNA-seq data for unpaired immature adults and paired mature adults (study PRJEB1237). Stratum S0 is represented in grey and S1man in orange. P-values denote the significance of the difference in expression between W- and Z-derived transcripts, considering both strata together (Wilcoxon test).

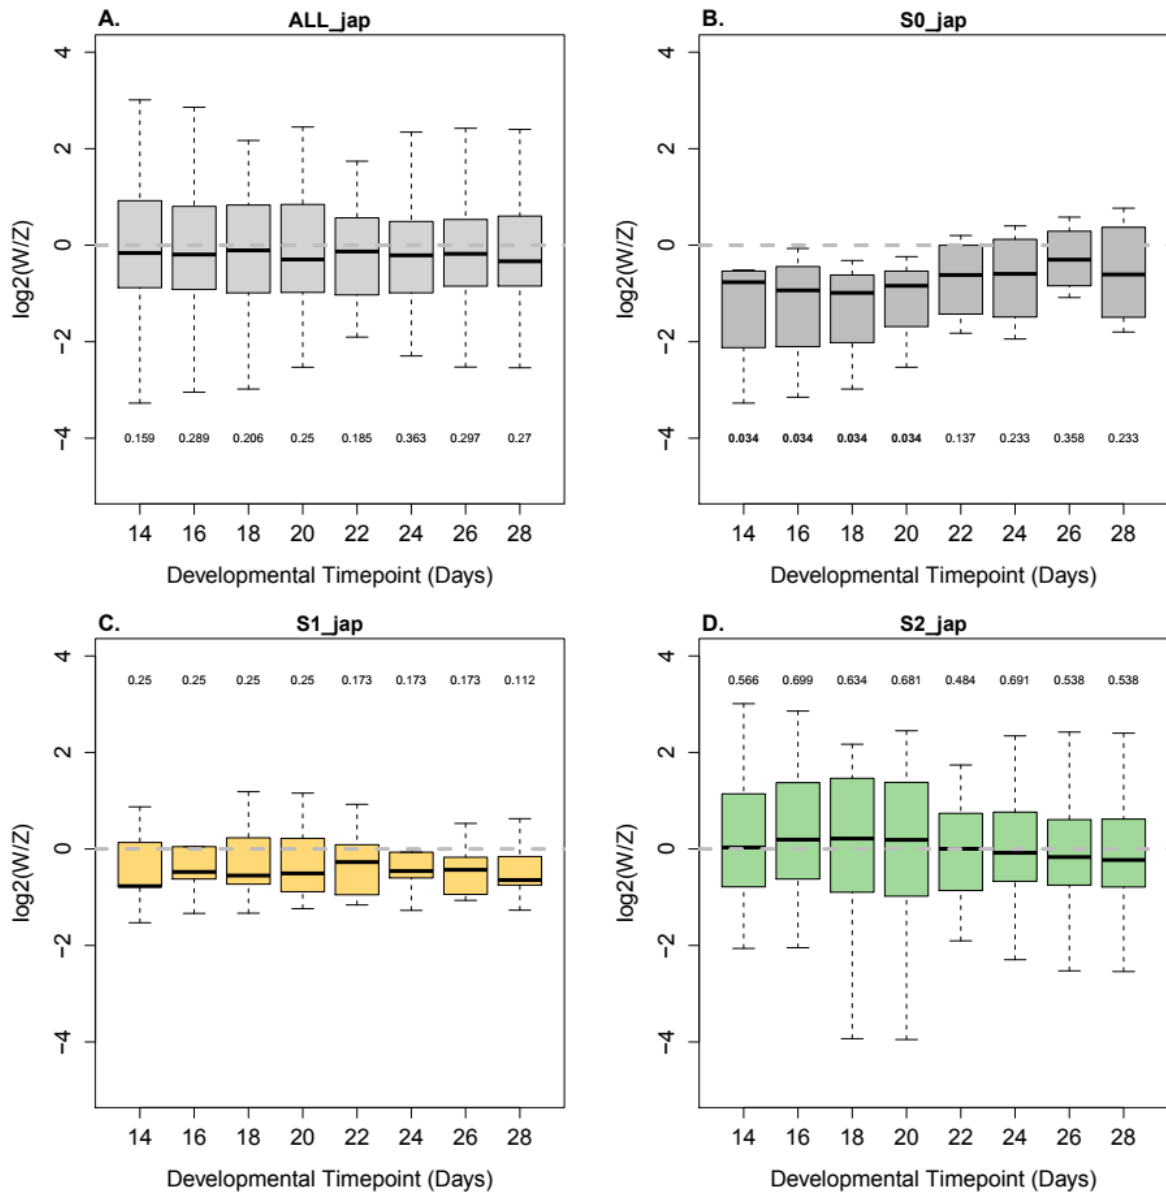

**Supplementary Figure 9. Boxplots of the log<sub>2</sub>-transformed W-to-Z ratio of expression for *S. japonicum* for all the candidates across 8 developmental timepoints (study PRJNA312093): all strata together (A, light grey), stratum S0jap (B, dark grey), stratum S1jap (C, yellow), stratum S2jap (D, green). P-values on the plot show the significance of differences between W and Z (Wilcoxon test).**

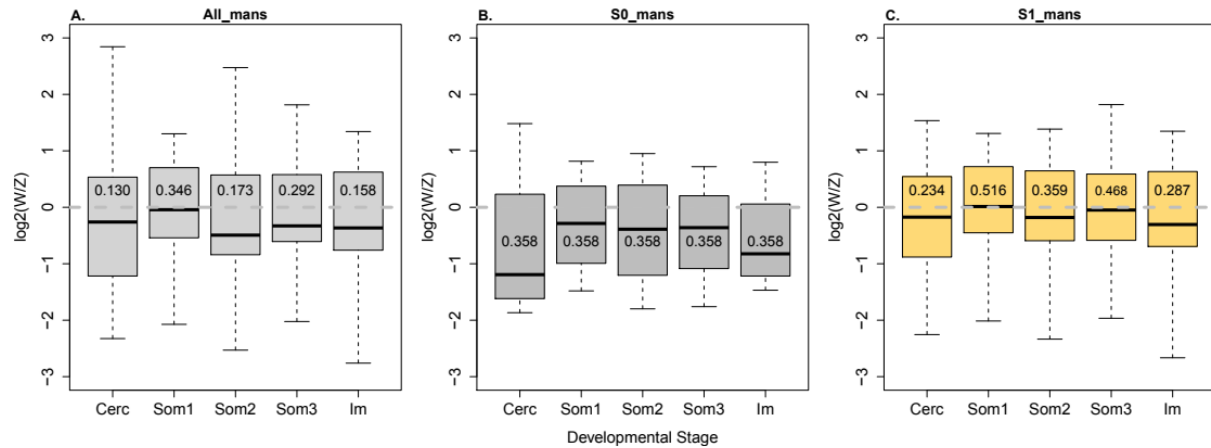

**Supplementary Figure 10.** Boxplots of the  $\log_2$ -transformed paired W/Z expression for *S. mansoni* for all the candidates across 5 developmental stages (study PRJNA343582): all strata together (A, light grey), stratum S0man (B, dark grey), stratum S1man (C, yellow). P-values on the plot show the significance of differences between W and Z (Wilcoxon test).

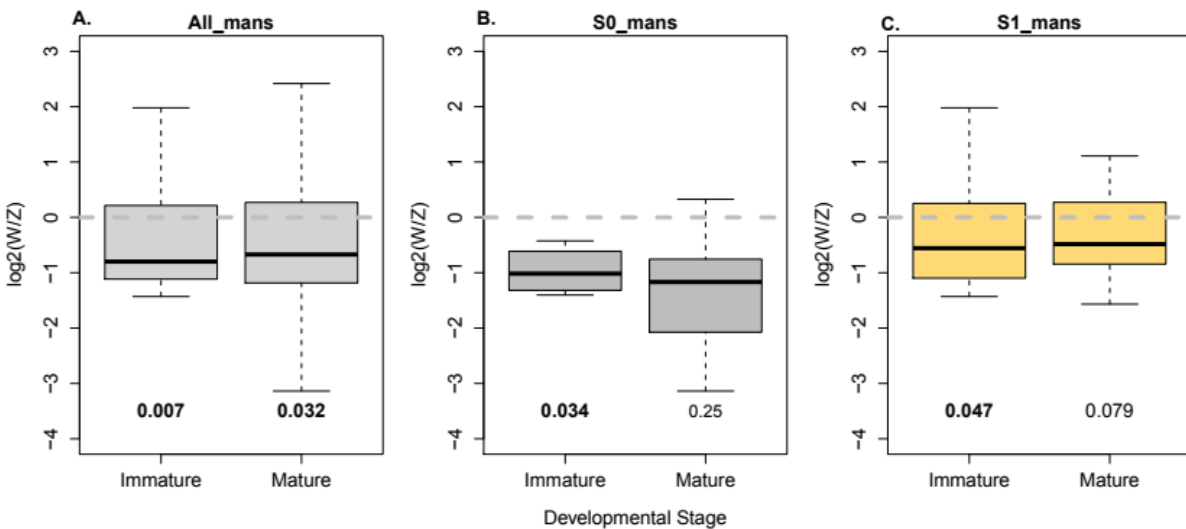

**Supplementary Figure 11.** Boxplots of the  $\log_2$ -transformed paired W/Z expression for *S. mansoni* using an alternative RNA dataset for all the candidates for unpaired immature adults and paired mature adults (study PRJEB1237): all strata together (A, light grey), stratum S0man (B, dark grey), stratum S1man (C, yellow). P-values on the plot show the significance of differences between W and Z (Wilcoxon test).

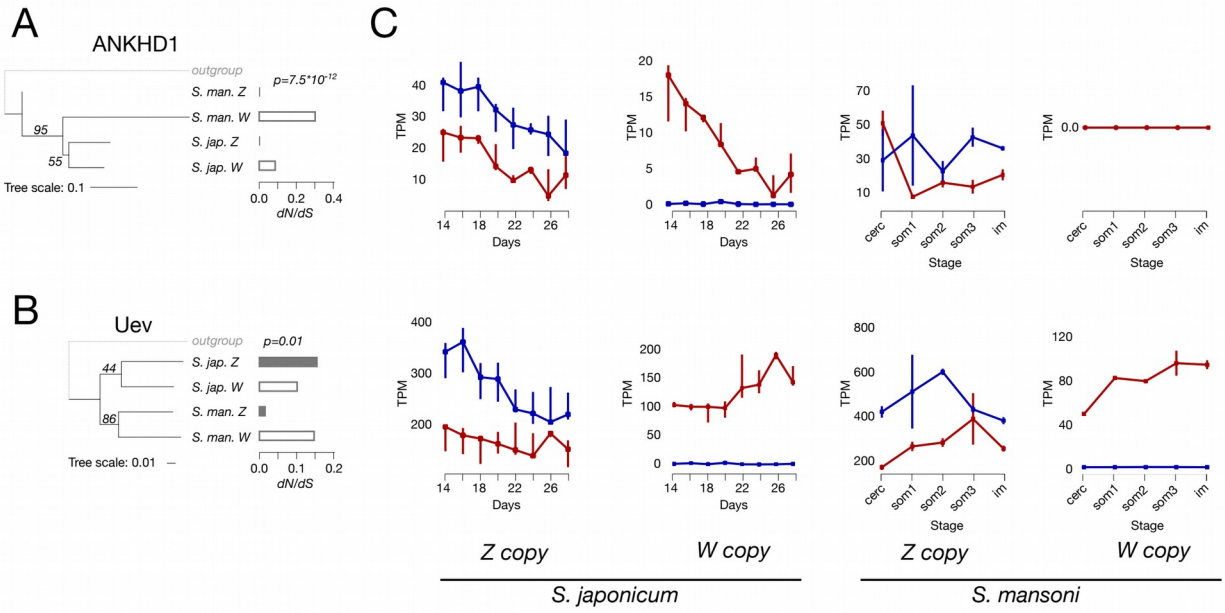

**Supplementary Figure 12: Evolution and expression of the shared S0 genes ANKHD1 and Uev.** Panels A and B show gene trees with bootstrap values, respectively for ANKHD1 and UeV. Terminal-branch specific dN/dS values along with the Chi-squared p-values of the deviations of observed values from the uniform assumption are shown as histograms. White bars portray dN/dS of W-specific genes, grey bars show dN/dS values of the Z-copies. Panel C shows gene expression values (TPM) of Z- and W-copies of the two S0 genes on different developmental stages of *S. japonicum* and *S. mansoni*. For *S. japonicum*, the spread between the lowest and the highest value among the three replicates is shown with error-bars, medians are shown with dots. Stages in *S. mansoni*: “cerc” means cercariae, “som1-3” are three subsequent schistosomula stages and “im” stands for immature adults. Red and blue lines show TPM values of females and males, respectively. The panels A and B and the respective genes correspond to lines of plots on the panel C.

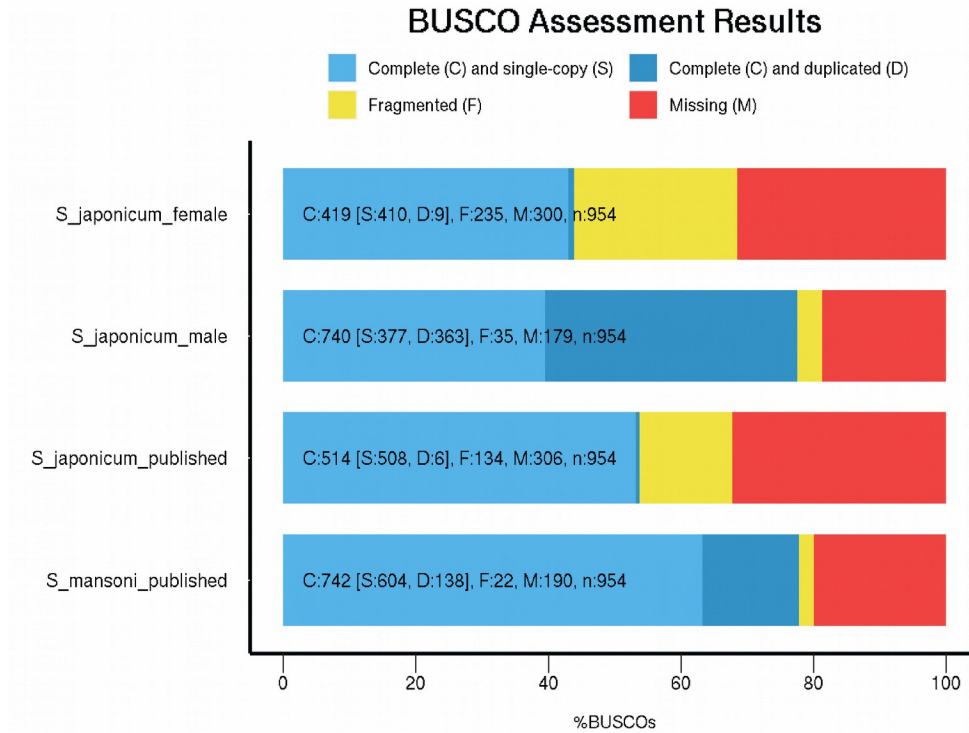

**Supplementary Figure 13. Quality assessment of *S. japonicum* male and female *de novo* transcriptome assemblies** used in the process of improving the assembly of *S. japonicum* candidate W transcripts. The BUSCO scores for the two assemblies are shown along with *S. japonicum* and *S. mansoni* published transcriptomes.

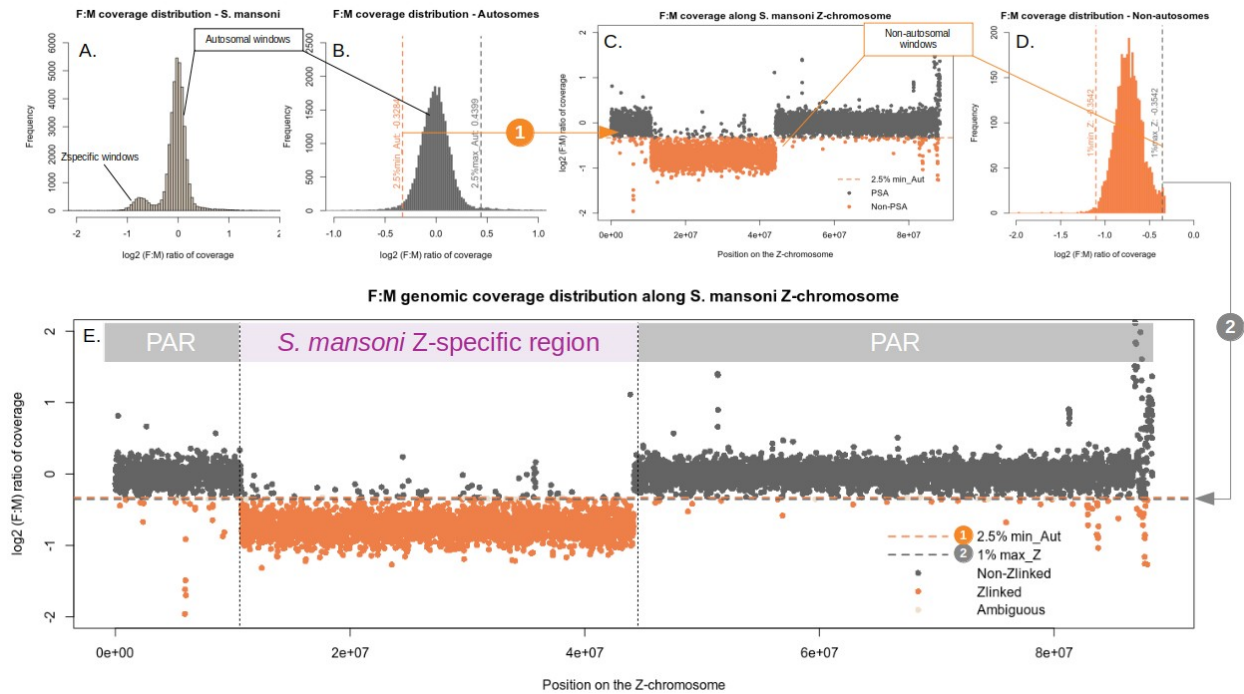

**Supplementary Figure 14. Determination of *S. mansoni* Z-specific regions.** The distribution of the female-to-male (F:M) coverage ratio is plotted in A (log<sub>2</sub> scale) and displays a bimodal distribution. The highest peak, around 0, corresponds to the autosomal windows that are plotted alone in B. We determined a lower threshold of -0.3284 (orange disk#1, corresponding to the 2.5th percentile of the autosome distribution), which defines the lowest log<sub>2</sub>(F:M) value for autosomal windows (orange dashed line in B and C). We then extracted non-autosomal windows (in orange) and plotted their distribution in D. The value corresponding to the 99th percentile of this unimodal distribution was then used as the upper limit coverage of Z-specific regions in E (*i.e.* log<sub>2</sub>(F:M)=-0.3542, grey disk#2). In E, the few ambiguous windows (plotted in beige), are windows with a log<sub>2</sub>(F:M) between the defined upper limit of Z-specific regions (grey dashed line) and the lower limit of autosomal regions (orange dashed line). Purple and grey rectangles respectively represent the final *S. mansoni* Z-specific and pseudoautosomal (PAR) regions, plotted along the Z.



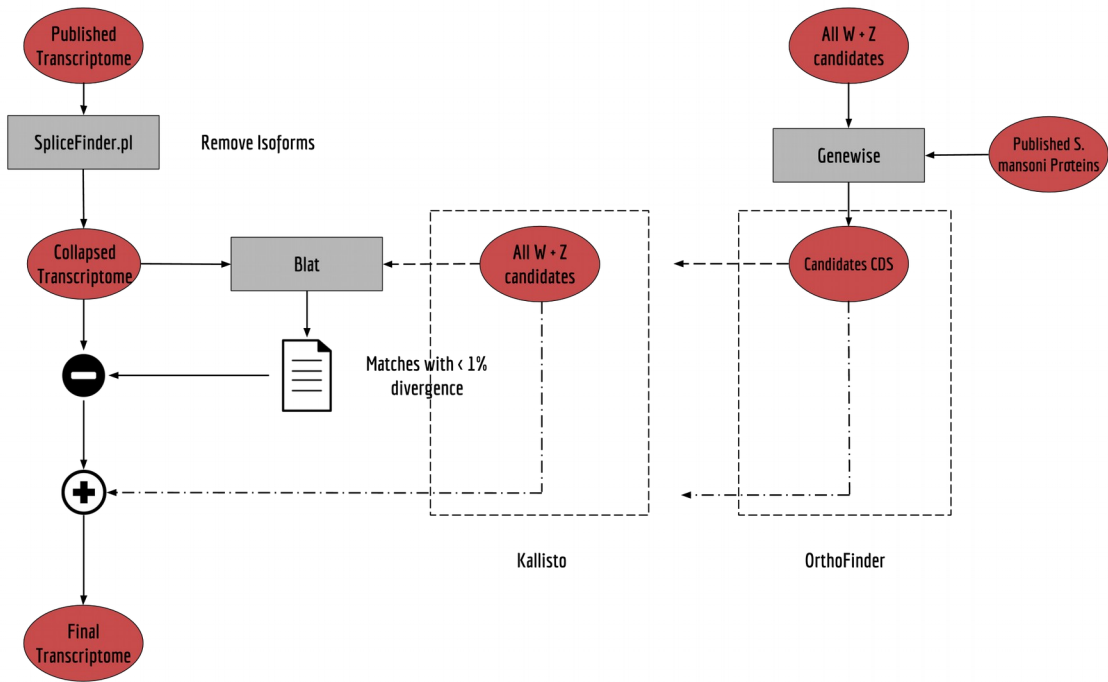

**Supplementary Figure 15.** Bioinformatic steps followed to produce the reference transcriptomes used for the Kallisto and OrthoFinder analyses. It has been similarly applied in both species.

### 3. Supplementary Tables

**Supplementary Table 1. Publicly available DNA/RNA-seq libraries used in the different sections.**

| Section                                                                                           | BioProject/<br>SRA Study                         | Run                                                                                                                                      | Sex                                                                                              | Number of individuals                                                                                                                                                                                                                                     | Developmental<br>stage                                                                                       | Strategy    |
|---------------------------------------------------------------------------------------------------|--------------------------------------------------|------------------------------------------------------------------------------------------------------------------------------------------|--------------------------------------------------------------------------------------------------|-----------------------------------------------------------------------------------------------------------------------------------------------------------------------------------------------------------------------------------------------------------|--------------------------------------------------------------------------------------------------------------|-------------|
| 4.2 k-mer<br>based<br>assembly and<br>filtering of <i>S.</i><br><i>mansoni</i> W-<br>linked genes | PRJEB2320/<br>ERP000385                          | ERR562989<br>ERR562990                                                                                                                   | Male<br>Female                                                                                   | 6000 ind. (uniclonal) †<br>6000 ind. (uniclonal)                                                                                                                                                                                                          | cercariae<br>cercariae                                                                                       | WGS         |
|                                                                                                   | PRJNA312093/<br>SRP071285                        | SRR3223434<br>SRR3223435<br>SRR3223443<br>SRR3223444<br>SRR3223447<br>SRR3223448                                                         | Female<br>Female<br>Female<br>Female<br>Female<br>Female                                         | Thousands (multiclonal) ††<br>Thousands (multiclonal)<br>Hundreds (multiclonal)<br>Hundreds (multiclonal)<br>Dozens (multiclonal)<br>Dozens (multiclonal)                                                                                                 | cercariae<br>cercariae<br>schistosomula2<br>schistosomula2<br>immature adult<br>immature adult               | RNA-<br>seq |
|                                                                                                   |                                                  | SRR3211868<br>SRR3216389<br>SRR3223428<br>SRR3223429<br>SRR3223432*<br>SRR3223433                                                        | Male<br>Male<br>Male<br>Male<br>Male<br>Male                                                     | Thousands (multiclonal)<br>Thousands (multiclonal)<br>Hundreds (multiclonal)<br>Hundreds (multiclonal)<br>Dozens (multiclonal)<br>Dozens (multiclonal)                                                                                                    | cercariae<br>cercariae<br>schistosomula2<br>schistosomula2<br>immature adult<br>immature adult               |             |
| PRJEB1237/<br>ERP002073                                                                           | ERR506083<br>ERR506084<br>ERR506088<br>ERR506090 | Female<br>Female<br>Male<br>Male                                                                                                         | 1 individual †<br>1 ind.<br>1 ind.<br>1 ind.                                                     | mature adult<br>mature adult<br>mature adult<br>mature adult                                                                                                                                                                                              | RNA-<br>seq                                                                                                  |             |
| 4.2 k-mer<br>based<br>assembly of <i>S.</i><br><i>japonicum</i> W-<br>linked genes                | PRJNA432803/<br>SRP135770                        | SRR6841388<br>SRR6841389                                                                                                                 | Female<br>Male                                                                                   | 33 ind. (multiclonal) †††<br>28 ind. (multiclonal)                                                                                                                                                                                                        | mature adult<br>mature adult                                                                                 | WGS         |
|                                                                                                   | PRJNA343582/<br>SRP090154                        | SRR4267990<br>SRR4279491<br>SRR4279496<br>SRR4267991                                                                                     | Female<br>Female<br>Male<br>Male                                                                 | 800-1000 (multiclonal) †††<br>600-800 (multiclonal)<br>600-800 (multiclonal)<br>800-1000 (multiclonal)                                                                                                                                                    | 14days<br>16days<br>16days<br>14days                                                                         | RNA-<br>seq |
|                                                                                                   |                                                  | PRJNA252904/<br>SRP043313                                                                                                                | SRR1421523<br>SRR1421524                                                                         | Female<br>Male                                                                                                                                                                                                                                            | 1 ind. †<br>1 ind.                                                                                           |             |
| 4.2 Filtering<br>the <i>S.</i><br><i>japonicum</i><br>candidates                                  | PRJNA354903/<br>SRP093905                        | SRR5054524<br>SRR5054649<br>SRR5054671<br>SRR5054674<br>SRR5054672<br>SRR5054673<br>SRR5054701                                           | Male<br>Male<br>Male<br>Male<br>Mixed<br>Mixed<br>Mixed                                          | 120 (unknown) †<br>150 (unknown)<br>160 (unknown)<br>90 (unknown)<br>60 (multiclonal)<br>100 (multiclonal)<br>150 (multiclonal)                                                                                                                           | mature adult<br>mature adult<br>mature adult<br>mature adult<br>mature adult<br>mature adult<br>mature adult | WGS         |
| 4.2 Assembly<br>of <i>S.</i><br><i>japonicum</i><br>female<br>transcriptome                       | PRJNA343582/<br>SRP090154                        | SRR4292206<br>SRR4292292<br>SRR4292299<br>SRR4292301<br>SRR4292306<br>SRR4296931<br>SRR4296934<br>SRR4296936<br>SRR4296938<br>SRR4296940 | Female<br>Female<br>Female<br>Female<br>Female<br>Female<br>Female<br>Female<br>Female<br>Female | 150-200 (multiclonal) †††<br>100-150 (multiclonal)<br>80-100 (multiclonal)<br>80-100 (multiclonal)<br>800-1000 (multiclonal)<br>600-800 (multiclonal)<br>500-600 (multiclonal)<br>200-250 (multiclonal)<br>150-200 (multiclonal)<br>100-150 (multiclonal) | 22days<br>24days<br>26days<br>28days<br>14days<br>16days<br>18days<br>20days<br>22days<br>24days             | RNA-<br>seq |

|                                                               |                           |                                                                                                                                                                                                                                                                                           |                                                                                                                                                                                              |                                                                                                                                                                                                                                                                                                                                                                                                                                                                                                                     |                                                                                                                                                                                                                                                                                                                                                      |         |
|---------------------------------------------------------------|---------------------------|-------------------------------------------------------------------------------------------------------------------------------------------------------------------------------------------------------------------------------------------------------------------------------------------|----------------------------------------------------------------------------------------------------------------------------------------------------------------------------------------------|---------------------------------------------------------------------------------------------------------------------------------------------------------------------------------------------------------------------------------------------------------------------------------------------------------------------------------------------------------------------------------------------------------------------------------------------------------------------------------------------------------------------|------------------------------------------------------------------------------------------------------------------------------------------------------------------------------------------------------------------------------------------------------------------------------------------------------------------------------------------------------|---------|
|                                                               |                           | SRR4296942<br>SRR4296944                                                                                                                                                                                                                                                                  | Female<br>Female                                                                                                                                                                             | 80-100 (multiclona)<br>80-100 (multiclona)                                                                                                                                                                                                                                                                                                                                                                                                                                                                          | 26days<br>28days                                                                                                                                                                                                                                                                                                                                     |         |
| <b>4.2 Assembly of <i>S. japonicum</i> male transcriptome</b> | PRJNA504625/<br>SRP168226 | SRR8175618                                                                                                                                                                                                                                                                                | Male                                                                                                                                                                                         | 20 (multiclona) †††                                                                                                                                                                                                                                                                                                                                                                                                                                                                                                 | adult                                                                                                                                                                                                                                                                                                                                                | RNA-seq |
| <b>4.4 Z-specific regions in <i>S. mansoni</i></b>            | PRJEB2320/<br>ERP000385   | ERR562989<br>ERR562990                                                                                                                                                                                                                                                                    | Male<br>Female                                                                                                                                                                               | 6000 (uniclona) †<br>6000 (uniclona)                                                                                                                                                                                                                                                                                                                                                                                                                                                                                | cercariae<br>cercariae                                                                                                                                                                                                                                                                                                                               | WGS     |
| <b>4.5 F<sub>ST</sub> analysis <i>S. japonicum</i></b>        | PRJNA650045/<br>SRP274938 | SRR12363890<br>SRR12363891<br>SRR12363892<br>SRR12363893<br>SRR12363894<br>SRR12363896<br>SRR12363898<br>SRR12363899<br>SRR12363900<br>SRR12363901<br>SRR12363902<br>SRR12363903<br>SRR12363904<br>SRR12363905<br>SRR12363907<br>SRR12363908<br>SRR12363909<br>SRR12363910<br>SRR12363911 | Male<br>Male<br>Male<br>Male<br>Female<br>Male<br>Female<br>Male<br>Female<br>Female<br>Male<br>Male<br>Male<br>Female<br>Male<br>Male<br>Male<br>Female<br>Female<br>Female<br>Male         | 1 individual †<br>1 ind.<br>1 ind.                                                                                                                                                                                                                                                                                              | Miracidia<br>Miracidia<br>Miracidia<br>Miracidia<br>Miracidia<br>Miracidia<br>Miracidia<br>Miracidia<br>Miracidia<br>Miracidia<br>Miracidia<br>Miracidia<br>Miracidia<br>Miracidia<br>Miracidia<br>Miracidia<br>Miracidia<br>Miracidia<br>Miracidia<br>Miracidia<br>Miracidia                                                                        | WGS     |
| <b>4.6 CNV analysis in <i>S. japonicum</i></b>                | PRJNA432803/<br>SRP135770 | SRR6841388<br>SRR6841389                                                                                                                                                                                                                                                                  | Female<br>Male                                                                                                                                                                               | 33 ind. (multiclona) †††<br>28 ind. (multiclona)                                                                                                                                                                                                                                                                                                                                                                                                                                                                    | mature adult<br>mature adult                                                                                                                                                                                                                                                                                                                         | WGS     |
| <b>4.8 Gene expression Analysis <i>S. mansoni</i></b>         | PRJNA312093/<br>SRP071285 | SRR3211868<br>SRR3216389<br>SRR3223426<br>SRR3223427<br>SRR3223428<br>SRR3223429<br>SRR3223430<br>SRR3223431<br>SRR3223433<br>SRR3223432*<br><br>SRR3223434<br>SRR3223435<br>SRR3223436<br>SRR3223439<br>SRR3223443<br>SRR3223444<br>SRR3223445<br>SRR3223446<br>SRR3223447<br>SRR3223448 | Male<br>Male<br>Male<br>Male<br>Male<br>Male<br>Male<br>Male<br>Male<br>Male<br>Male<br><br>Female<br>Female<br>Female<br>Female<br>Female<br>Female<br>Female<br>Female<br>Female<br>Female | Thousands (multiclona) ††<br>Thousands (multiclona)<br>Hundreds (multiclona)<br>Hundreds (multiclona)<br>Hundreds (multiclona)<br>Hundreds (multiclona)<br>Hundreds (multiclona)<br>Hundreds (multiclona)<br>Hundreds (multiclona)<br>Dozens (multiclona)<br>Dozens (multiclona)<br><br>Thousands (multiclona)<br>Thousands (multiclona)<br>Hundreds (multiclona)<br>Hundreds (multiclona)<br>Hundreds (multiclona)<br>Hundreds (multiclona)<br>Hundreds (multiclona)<br>Dozens (multiclona)<br>Dozens (multiclona) | cercariae<br>cercariae<br>schistosomula1<br>schistosomula1<br>schistosomula2<br>schistosomula2<br>schistosomula3<br>schistosomula3<br>immature adult<br>immature adult<br><br>cercariae<br>cercariae<br>schistosomula1<br>schistosomula1<br>schistosomula2<br>schistosomula2<br>schistosomula3<br>schistosomula3<br>immature adult<br>immature adult | RNA-seq |
|                                                               | PRJEB1237/<br>ERP002073   | ERR506083<br>ERR506084                                                                                                                                                                                                                                                                    | Female<br>Female                                                                                                                                                                             | 1 individual †<br>1 ind.                                                                                                                                                                                                                                                                                                                                                                                                                                                                                            | mature adult<br>mature adult                                                                                                                                                                                                                                                                                                                         | RNA-seq |



**Supplementary Table 2. Publicly available assemblies used in the study.**

| Reference Assemblies | Source            | Species             | Release    | BioProject  | Downloaded On |
|----------------------|-------------------|---------------------|------------|-------------|---------------|
| CDS_transcripts      | WormBase Parasite | <i>S. japonicum</i> | WBPS14     | PRJEA34885  | 06-08-2020    |
|                      |                   | <i>S. mansoni</i>   | WBPS14     | PRJEA36577  | 31-07-2020    |
|                      |                   | <i>C. sinensis</i>  | WBPS14     | PRJNA386618 | 11-09-2020    |
| Genomic              |                   | <i>S. japonicum</i> | WBPS9      | PRJEA34885  | 29-09-2017    |
|                      |                   | <i>S. mansoni</i>   | WBPS14     | PRJEA36577  | 30-10-2020    |
| Protein              |                   | <i>S. mansoni</i>   | WBPS14     | PRJEA36577  | 09-11-2020    |
| Canonical Geneset    | <i>S. mansoni</i> | WBPS14              | PRJEA36577 | 23-07-2020  |               |

**Supplementary Table 3: Number of CNVs (loss) in female *S. japonicum*, depending on the genomic location.** CNV analyses were performed on windows of 1kb, 5kb and 10kb and the reported numbers correspond to all three analyses taken together. Only significant losses are shown (wilcoxon p-value < 0.05). Genomic location of *S. japonicum* genes was inferred thanks to one-to-one orthologs of *S. mansoni*.

| Genomic location                     |        | Total number of <i>S. mansoni</i> genes | Deleted copies (CNVs) | Proportion of deletion |
|--------------------------------------|--------|-----------------------------------------|-----------------------|------------------------|
| SM_V7_ZW                             | S0     | 635                                     | 44                    | 6,93 % *               |
|                                      | S1jap  | 143                                     | 8                     | 5,59 % *               |
|                                      | S1mans | 299                                     | 3                     | 1,00 %                 |
|                                      | S2jap  | 720                                     | 7                     | 0,97 %                 |
| SM_V7_1                              |        | 2371                                    | 21                    | 0,89 %                 |
| SM_V7_2                              |        | 1243                                    | 12                    | 0,97 %                 |
| SM_V7_3                              |        | 1244                                    | 11                    | 0,88 %                 |
| SM_V7_4                              |        | 1176                                    | 10                    | 0,85 %                 |
| SM_V7_5                              |        | 579                                     | 14                    | 2,42 %                 |
| SM_V7_6                              |        | 758                                     | 6                     | 0,79 %                 |
| SM_V7_7                              |        | 416                                     | 5                     | 1,20 %                 |
| n.a. (no <i>S. mansoni</i> ortholog) |        | -                                       | 13                    | -                      |

*\*These proportions are not representative of the true amount of gene loss in these ancient strata, as CONTROL-FREEC controls for background (scaffold) differences in coverage, thereby losing much of the signal when the whole sequence is missing.*

**Supplementary Table 4. Expression P-values (Kruskal-Wallis rank sum test) for comparisons of the strata specific expression of *S. mansoni* (using the Z-homologs) (study PRJNA343582).**

| Stage           | P-value      |
|-----------------|--------------|
| Cercariae       | <b>0.012</b> |
| Schistosomula 1 | 0.053        |
| Schistosomula 2 | 0.053        |
| Schistosomula 3 | <b>0.041</b> |
| Immature adults | <b>0.032</b> |

**Supplementary Table 5. Expression P-values (Kruskal-Wallis rank sum test) for comparisons of the strata specific expression *S. japonicum* (using the Z-homologs) (study PRJNA312093).**

| Time-point | P-value      |
|------------|--------------|
| 14 days    | <b>0.038</b> |
| 16 days    | <b>0.038</b> |
| 18 days    | <b>0.039</b> |
| 20 days    | <b>0.037</b> |
| 22 days    | <b>0.047</b> |
| 24 days    | <b>0.04</b>  |
| 26 days    | 0.051        |
| 28 days    | <b>0.032</b> |

**Supplementary Table 6. Expression P-values (Kruskal-Wallis rank sum test) for comparisons of the strata specific expression of *S. mansoni* (using the Z-homologs) using an alternative RNA dataset (study PRJEB1237).**

| Stage                    | P-value      |
|--------------------------|--------------|
| Immature unpaired adults | 0.053        |
| Mature paired adults     | <b>0.047</b> |

**Supplementary Table 7: *De novo* evolutionary strata coordinates.** Coordinates were defined based on the *S. mansoni* reference genome v7 (GCA\_000237925.3 assembly): a stratum starts at the first base of the first CDS that it contains.

| Strata/PAR on the Z | Start (bases) | Stop (bases) |
|---------------------|---------------|--------------|
| S0                  | 21,065,055    | 21,940,030   |
|                     | 23,467,694    | 44,205,956   |
| S1man               | 10,740,979    | 21,065,054   |
|                     | 21,940,031    | 23,467,693   |
| S1jap               | 44,205,957    | 45,023,775   |
|                     | 46,909,733    | 51,501,679   |
| S2jap               | 45,023,776    | 46,909,732   |
|                     | 51,501,680    | 78,402,349   |
| Shared PAR          | 0             | 10,740,978   |
|                     | 78,402,350    | end          |

## 4. Supplementary Codes

All supplementary codes are available on: [https://github.com/Melkrewi/Schisto\\_project](https://github.com/Melkrewi/Schisto_project)

### Supplementary Code 1: Generic k-mer pipeline to detect and assemble W-transcripts from male and female DNA and RNA sequencing data.

\*kmercountexact.sh and bbduk.sh scripts mentioned below are part of the BMAP package.

```
module load java
module load bmap

kmercountexact.sh k=31 in1=female_dna_forward_reads.fq in2=female_dna_reverse_reads.fq
out=female_dna_mers.fa #k-mer counting paired DNA library

kmercountexact.sh k=31 in=pooled_rna_replicate_1.fq out=female_rna_mers_1.fa #k-mer counting
single-end RNA library

kmercountexact.sh k=31 in=pooled_rna_replicate_2.fq out=female_rna_mers_2.fa

kmercountexact.sh k=31 in=female_dna_mers.fa,female_rna_mers_1.fa,female_rna_mers_2.fa
out=shared_female_mers.fa mincount=3 #outputs shared k-mers between DNA and RNA

bbduk.sh k=31 in=shared_female_mers.fa out=female_specific_mers.fa
ref=male_dna_forward_reads.fq,male_dna_reverse_reads.fq #removes k-mers matching male dna

bbduk.sh k=31 in=female_specific_mers.fa out=v_female_specific_mers.fa
ref=male_rna_1.fq,male_rna_2.fq,male_rna_3.fq,... #removes k-mers matching male RNA libraries

bbduk.sh k=31 in=pooled_rna_replicate_2.fq outm=female_specific_rna_reads_1.fastq
ref=v_female_specific_mers.fa mink-merfraction=0.4

bbduk.sh k=31 in=pooled_rna_replicate_2.fq outm=female_specific_rna_reads_2.fastq
ref=v_female_specific_mers.fa mink-merfraction=0.4
```

### Supplementary Code 2: *S. mansoni* k-mer based identification and assembly of candidate W-derived transcripts

#### 2.1 Bash commands used to pool the developmental stages together

```
#csi_1.fq:
cat SRR3223434_trimmed.fq SRR3223443_trimmed.fq SRR3223447_trimmed.fq > csi_1.fq
#csi_2.fq:
cat SRR3223435_trimmed.fq SRR3223444_trimmed.fq SRR3223448_trimmed.fq > csi_2.fq

#ERR50608:
cat ERR506083_forward_paired.fq.gz ERR506084_forward_paired.fq.gz > ERR50608_1.fq.gz
cat ERR506083_reverse_paired.fq.gz ERR506084_reverse_paired.fq.gz > ERR50608_2.fq.gz

#csim_1.fq:
cat ERR506083_forward_paired.fq.gz ERR506083_reverse_paired.fq.gz > ERR506083.fq.gz
gunzip ERR506083.fq.gz
```



```
cat ERR506083.fq csi_1.fq > csim_1.fq

#csim_2.fq:
cat ERR506084_forward_paired.fq.gz ERR506084_reverse_paired.fq.gz > ERR506084.fq.gz
gunzip ERR506084.fq.gz
cat ERR506084.fq csi_2.fq > csim_2.fq
```

## 2.2 Running the k-mer pipeline on the pooled data

```
module load java
module load bbmap

kmer=31

echo "### Step 0: Kmer pipeline starting"
kmercountexact.sh k=$kmer in1=ERR562990_forward_paired.fq.gz
in2=ERR562990_reverse_paired.fq.gz out=female_dna_mer_1.fa

kmercountexact.sh k=$kmer in=csim_1.fq out=sfemale_rna_mer_1.fa

kmercountexact.sh k=$kmer in=csim_2.fq out=sfemale_rna_mer_2.fa

kmercountexact.sh k=$kmer in=female_dna_mer_1.fa,sfemale_rna_mer_1.fa,sfemale_rna_mer_2.fa
out=shared_female_mer.fa mincount=3

bbduk.sh k=$kmer in=shared_female_mer.fa out=female_specific_mers.fasta
ref=ERR562989_forward_paired.fq.gz,ERR562989_reverse_paired.fq.gz -Xmx350g

bbduk.sh k=$kmer in=female_specific_mers.fasta out=v_female_specific_mers.fasta
ref=ERR506088_forward_paired.fq.gz,ERR506088_reverse_paired.fq.gz,ERR506090_forward_paired.f
q.gz,ERR506090_reverse_paired.fq.gz

bbduk.sh k=$kmer in=v_female_specific_mers.fasta out=v_v_female_specific_mers.fasta
ref=SRR3211868_trimmed.fq,SRR3216389_trimmed.fq,SRR3223428_trimmed.fq,SRR3223429_trimm
ed.fq,SRR3223433_trimmed.fq,E1bis_E2bis_CTTGTA_L003_R1_concat_trimmed.fq

bbduk.sh k=$kmer in=csi_1.fq outm=female_specific_rna_reads_1.fastq
ref=v_v_female_specific_mers.fasta minkmerfraction=0.4

bbduk.sh k=$kmer in=csi_2.fq outm=female_specific_rna_reads_2.fastq
ref=v_v_female_specific_mers.fasta minkmerfraction=0.4

bbduk.sh k=$kmer in1=ERR50608_1.fq.gz in2=ERR50608_2.fq.gz
outm1=mature_adult_specific_rna_reads_1.fastq outm2=mature_adult_specific_rna_reads_2.fastq
ref=v_v_female_specific_mers.fasta minkmerfraction=0.4
```

## 2.3 Concatenation of the two female\_specific\_rna\_reads files before the assembly step

```
cat female_specific_rna_reads_1.fastq female_specific_rna_reads_2.fastq >
female_specific_rna_reads.fastq
```

## 2.4 SOAPdenovo-trans config file used to assemble the output of the k-mer pipeline

```
#maximal read length
max_rd_len=101
[LIB]
#maximal read length in this lib
rd_len_cutoff=101
#average insert size
avg_ins=100
#if sequence needs to be reversed
reverse_seq=0
#in which part(s) the reads are used
asm_flags=3
#minimum aligned length to contigs for a reliable read location (at least 32 for short insert size)
map_len=32
#fastq file for read 1
q1=mature_adult_specific_rna_reads_1.fastq
q2=mature_adult_specific_rna_reads_2.fastq
q=female_specific_rna_reads.fastq
```

## 2.5 Assembly using SOAPdenovo

```
echo "### Step 1: Assembly of Candidates"
module load SOAPdenovoTrans
srun SOAPdenovo-Trans-31mer all -s soapconfig.txt -K 15 -o TranscriptAssembly -p 16 1>
TranscriptAssembly.stdout 2> TranscriptAssembly.stderr
```

## 2.6 *faFilter* to remove transcripts < 200bp

```
echo "### Step 2: Removing candidates shorter than 200 bp"
module load fafilter
srun faFilter -minSize=200 TranscriptAssembly.scafSeq mansoni_200.fasta
```

## 2.7 *Bowtie2* to map the male and female genomic reads to the W candidates and count perfect matches

```
echo "### Step 3: Filtering Stage 1"
module load java
```

```

module load bowtie2/2.3.4.1

srunch bowtie2-build mansoni_200.fasta transcripts_w

srunch bowtie2 -p 8 --no-unal --no-hd --no-sq -x transcripts_w -U ERR562990_1.fastq -S female_1.sam

srunch bowtie2 -p 8 --no-unal --no-hd --no-sq -x transcripts_w -U ERR562989_1.fastq -S male_1.sam

awk '($6=="100M")' female_1.sam | grep 'NM:i:0' > female_1_perfectmatch.sam

awk '($6=="100M")' male_1.sam | grep 'NM:i:0' > male_1_perfectmatch.sam

grep '>' mansoni_200.fasta | perl -pi -e 's/>//gi' | perl -pi -e 's/ .*//gi' > transcripts.list

cat female_1_perfectmatch.sam | cut -f 3 | cat /dev/stdin transcripts.list | sort | uniq -c | awk '{print $2, $1-1}' > female_1_perfectmatch.counts

cat male_1_perfectmatch.sam | cut -f 3 | cat /dev/stdin transcripts.list | sort | uniq -c | awk '{print $2, $1-1}' > male_1_perfectmatch.counts

module load R

Rscript merge_results.R

module load python

python contigs_list.py

perl -ne 'if(/>(\S+)/){$c=$i{$1}}$c?print:chomp;$i{$1}=1 if @ARGV' contigs_list.txt
mansoni_200.fasta > mansoni_transcripts_filtered_by_coverage.fasta

rm contigs_list.txt

rm *.counts

module load blat

perl SpliceFinder_2.pl mansoni_transcripts_filtered_by_coverage.fasta

echo "Add SM_W_ to the names of the transcripts"
perl -p -e "s/^>/>SM_W_/g" mansoni_transcripts_filtered_by_coverage.fasta.long >
Final_Mansoni_W_transcripts_renamed.fasta

```

merge\_results.R:

```

male_1 <-read.table("male_1_perfectmatch.counts", head=F, sep="")
female_1 <-read.table("female_1_perfectmatch.counts", head=F, sep="")
male_vs_female <- merge(male_1,female_1,by.x="V1", by.y="V1")
write.csv(male_vs_female, file = "transcripts_counts.csv")

```

contigs\_list.py:

```

import pandas as pd
import numpy as np
df1 = pd.read_csv("transcripts_counts.csv")
df1=df1.drop(['Unnamed: 0'], axis='columns')
df1 = df1.rename(columns={'V1': 'Contig','V2.x': 'Male_1','V2.y': 'Female_1'})
df1['Ratio']=df1['Male_1']/(df1['Male_1']+df1['Female_1'])
df2=df1[(df1['Ratio']<=0.1)]
df2=df2[(df2['Female_1']>=20)]

```

```
text_file = open("contigs_list.txt", "w")
for item in df2['Contig']:
    text_file.write('%s' % item + '\n')
text_file.close()
```

**2.8 Final list of W-candidates** All transcripts that had less than 20 perfectly matching female reads and a ratio of (male/(male+female)) perfect matches of more than 0.1 were removed. In order to have a more comprehensive set of candidates, the annotated W transcripts (32) which were either recovered partially or not recovered at all were added to our set of candidates.

Adding annotated W transcripts:

```
module load blat
perl -ne 'if(/^>(\S+)/){$c=$i{$1}}$c?print:chomp;$i{$_}=1 if @ARGV' w_genes_list.txt
schistosoma_mansoni.PRJEA36577.WBPS14.CDS_transcripts.fa > annotated_w_genes_CDS.fasta

cat Final_Mansoni_W_transcripts_renamed.fasta annotated_w_genes_CDS.fasta >
Final_combined_mansoni_set.fasta

perl SpliceFinder_2.pl Final_combined_mansoni_set.fasta
```

w\_genes\_list includes all the isoforms of the annotated W transcripts in the list below that are in the reference CDS:

```
Smp_301330
Smp_318640
Smp_318650
Smp_020920
Smp_318660
Smp_331650
Smp_318670
Smp_318680
Smp_318690
Smp_318710
Smp_323380
Smp_310950
Smp_312650
Smp_320660
Smp_320670
Smp_320680
Smp_320940
Smp_335650
Smp_324690
Smp_324700
Smp_324710
Smp_336560
Smp_325490
Smp_327030
Smp_308070
Smp_344700
Smp_317860
Smp_317870
Smp_336600
Smp_146490
Smp_045040
Smp_303540
```

## Supplementary Code 3: *S. japonicum* k-mer based identification and assembly of candidate W-derived transcripts

### 3.1 k-mer pipeline

```
module load java
module load bbmap

kmer=31

echo "### Step 0: Kmer pipeline starting"
kmercountexact.sh k=$kmer in1=40641_GTCCGC_1_paired.fq.gz
in2=40641_GTCCGC_2_paired.fq.gz out=female_dna_mer_1.fa

kmercountexact.sh k=$kmer in=SRR4267990_trimmed.fq.gz
out=sfemale_rna_schistosomula_mer_1.fa

kmercountexact.sh k=$kmer in=SRR4279491_trimmed.fq.gz
out=sfemale_rna_schistosomula_mer_2.fa

kmercountexact.sh k=$kmer in1=SRR1421523_1_paired.fastq in2=SRR1421523_2_paired.fastq
out=sfemale_rna_mature_adult_mer_1.fa

cat sfemale_rna_schistosomula_mer_1.fa sfemale_rna_schistosomula_mer_2.fa
sfemale_rna_mature_adult_mer_1.fa > sfemale_rna_mer_1.fa

kmercountexact.sh k=$kmer in=female_dna_mer_1.fa,sfemale_rna_mer_1.fa
out=shared_female_mer.fa mincount=2

bbduk.sh k=$kmer in=shared_female_mer.fa out=female_specific_mers.fasta
ref=40640_ACTGAT_1_paired.fq.gz,40640_ACTGAT_2_paired.fq.gz -Xmx350g

bbduk.sh k=$kmer in=female_specific_mers.fasta out=v_female_specific_mers.fasta
ref=SRR4267991_trimmed.fq.gz,SRR4279496_trimmed.fq.gz

bbduk.sh k=$kmer in=v_female_specific_mers.fasta out=v_v_female_specific_mers.fasta
ref=SRR1421524_1_paired.fastq,SRR1421524_2_paired.fastq

bbduk.sh k=$kmer in=SRR4267990_trimmed.fq.gz outm=schistosomula_specific_rna_reads_1.fastq
ref=v_v_female_specific_mers.fasta minkmerfraction=0.4

bbduk.sh k=$kmer in=SRR4279491_trimmed.fq.gz outm=schistosomula_specific_rna_reads_2.fastq
ref=v_v_female_specific_mers.fasta minkmerfraction=0.4

bbduk.sh k=$kmer in1=SRR1421523_1_paired.fastq in2=SRR1421523_2_paired.fastq
outm1=mature_adult_specific_rna_reads_1_1.fastq
outm2=mature_adult_specific_rna_reads_1_2.fastq ref=v_v_female_specific_mers.fasta
minkmerfraction=0.4
```

### 3.2 Concatenation before assembly

```
cat schistosomula_specific_rna_reads_1.fastq schistosomula_specific_rna_reads_2.fastq >
female_specific_rna_reads.fastq
```

### 3.3 SOAPdenovo-trans config file used for the assembly

```
#maximal read length
max_rd_len=101
[LIB]
#maximal read length in this lib
rd_len_cutoff=101
#average insert size
avg_ins=50
#if sequence needs to be reversed
reverse_seq=0
#in which part(s) the reads are used
asm_flags=3
#minimum aligned length to contigs for a reliable read location (at least 32 for short insert size)
map_len=32
#fastq file for read 1
q1=mature_adult_specific_rna_reads_1_1.fastq
q2=mature_adult_specific_rna_reads_1_2.fastq
q=female_specific_rna_reads.fastq
```

### 3.4 SOAPdenovo-trans assembly

```
echo "### Step 1: Assembly of Candidates"
module load SOAPdenovoTrans

srun SOAPdenovo-Trans-31mer all -s soapconfig.txt -K 15 -o TranscriptAssembly -p 16 1>
TranscriptAssembly.stdout 2> TranscriptAssembly.stderr
```

### 3.5 faFilter to remove transcripts shorter than 200bp

```
echo "### Step 2: Removing candidates shorter than 200 bp"
module load fafilter
srun faFilter -minSize=200 TranscriptAssembly.scafSeq japonicum_200.fasta
```

### 3.6 Bowtie2 to map the male and female genomic reads to the W candidates and count perfect matches

```
echo "### Step 3: Filtering Stage 1"
module load bowtie2/2.3.4.1

srun bowtie2-build japonicum_200.fasta transcripts_w
```

```

srun bowtie2 -p 8 --no-unal --no-hd --no-sq -x transcripts_w -U SRR5054672_1.fastq -S mixed_1.sam
srun bowtie2 -p 8 --no-unal --no-hd --no-sq -x transcripts_w -U SRR5054673_1.fastq -S mixed_2.sam
srun bowtie2 -p 8 --no-unal --no-hd --no-sq -x transcripts_w -U SRR5054701_1.fastq -S mixed_3.sam
srun bowtie2 -p 8 --no-unal --no-hd --no-sq -x transcripts_w -U SRR5054524_1.fastq -S male_1.sam
srun bowtie2 -p 8 --no-unal --no-hd --no-sq -x transcripts_w -U SRR5054649_1.fastq -S male_2.sam
srun bowtie2 -p 8 --no-unal --no-hd --no-sq -x transcripts_w -U SRR5054671_1.fastq -S male_3.sam
srun bowtie2 -p 8 --no-unal --no-hd --no-sq -x transcripts_w -U SRR5054674_1.fastq -S male_4.sam

awk '($6=="100M")' mixed_1.sam | grep 'NM:i:0' > mixed_1_perfectmatch.sam
awk '($6=="100M")' mixed_2.sam | grep 'NM:i:0' > mixed_2_perfectmatch.sam
awk '($6=="100M")' mixed_3.sam | grep 'NM:i:0' > mixed_3_perfectmatch.sam
awk '($6=="100M")' male_1.sam | grep 'NM:i:0' > male_1_perfectmatch.sam
awk '($6=="100M")' male_2.sam | grep 'NM:i:0' > male_2_perfectmatch.sam
awk '($6=="100M")' male_3.sam | grep 'NM:i:0' > male_3_perfectmatch.sam
awk '($6=="100M")' male_4.sam | grep 'NM:i:0' > male_4_perfectmatch.sam

grep '>' japonicum_200.fasta | perl -pi -e 's/>/gi' | perl -pi -e 's/.*//gi' > transcripts.list

cat mixed_1_perfectmatch.sam | cut -f 3 | cat /dev/stdin transcripts.list | sort | uniq -c | awk '{print $2, $1-1}' > mixed_1_perfectmatch.counts

cat mixed_2_perfectmatch.sam | cut -f 3 | cat /dev/stdin transcripts.list | sort | uniq -c | awk '{print $2, $1-1}' > mixed_2_perfectmatch.counts

cat mixed_3_perfectmatch.sam | cut -f 3 | cat /dev/stdin transcripts.list | sort | uniq -c | awk '{print $2, $1-1}' > mixed_3_perfectmatch.counts

cat male_1_perfectmatch.sam | cut -f 3 | cat /dev/stdin transcripts.list | sort | uniq -c | awk '{print $2, $1-1}' > male_1_perfectmatch.counts

cat male_2_perfectmatch.sam | cut -f 3 | cat /dev/stdin transcripts.list | sort | uniq -c | awk '{print $2, $1-1}' > male_2_perfectmatch.counts

cat male_3_perfectmatch.sam | cut -f 3 | cat /dev/stdin transcripts.list | sort | uniq -c | awk '{print $2, $1-1}' > male_3_perfectmatch.counts

cat male_4_perfectmatch.sam | cut -f 3 | cat /dev/stdin transcripts.list | sort | uniq -c | awk '{print $2, $1-1}' > male_4_perfectmatch.counts

module load R

Rscript merge_results.R

module load python

python contigs_list.py

```

```
perl -ne 'if(/^>(\S+)){$c=${1}}$c?print:chomp;${1}_=1 if @ARGV' contigs_list.txt
japonicum_200.fasta > Japonicum_transcripts_filtered_by_coverage.fasta
```

merge\_results.R:

```
male_1 <-read.table("male_1_perfectmatch.counts", head=F, sep="")
male_2 <-read.table("male_2_perfectmatch.counts", head=F, sep="")
male_3 <-read.table("male_3_perfectmatch.counts", head=F, sep="")
male_4 <-read.table("male_4_perfectmatch.counts", head=F, sep="")
mixed_1 <-read.table("mixed_1_perfectmatch.counts", head=F, sep="")
mixed_2 <-read.table("mixed_2_perfectmatch.counts", head=F, sep="")
mixed_3 <-read.table("mixed_3_perfectmatch.counts", head=F, sep="")
male_vs_mixed <- merge(male_1,male_2,by.x="V1", by.y="V1")
male_vs_mixed <- merge(male_vs_mixed,male_3,by.x="V1", by.y="V1")
male_vs_mixed <- merge(male_vs_mixed,male_4,by.x="V1", by.y="V1")
male_vs_mixed <- merge(male_vs_mixed,mixed_1,by.x="V1", by.y="V1")
male_vs_mixed <- merge(male_vs_mixed,mixed_2,by.x="V1", by.y="V1")
male_vs_mixed <- merge(male_vs_mixed,mixed_3,by.x="V1", by.y="V1")
write.csv(male_vs_mixed, file = "transcripts_counts.csv")
```

contigs\_list.py:

```
import pandas as pd
import numpy as np
df1 = pd.read_csv("transcripts_counts.csv")
df1=df1.drop(['Unnamed: 0'], axis='columns')
df1 = df1.rename(columns={'V1': 'Contig','V2.x': 'Male_1','V2.y': 'Male_2','V2.x.1': 'Male_3','V2.y.1':
'Male_4','V2.x.2': 'Mixed_1','V2.y.2': 'Mixed_2','V2': 'Mixed_3'})
df1['Mixed_sum']=df1['Mixed_1']+df1['Mixed_2']+df1['Mixed_3']
df1['Male_sum']=df1['Male_1']+df1['Male_2']+df1['Male_3']+df1['Male_4']
df1['Ratio']=df1['Male_sum']/(df1['Male_sum']+df1['Mixed_sum'])
df2=df1[(df1['Ratio']<=0.1)]
df2=df2[(df2['Mixed_sum']>=15)]
text_file = open("contigs_list.txt", "w")
for item in df2['Contig']:
    text_file.write('%s' % item +'\n')
text_file.close()
```

### 3.7 The long k-mer female assembly used to improve the *S. japonicum* candidates

#### 3.7.1. The config file for the assembly: soapconfig\_trans.txt

```
#maximal read length
max_rd_len=150
[LIB]
#maximal read length in this lib
rd_len_cutof=150
#average insert size
avg_ins=0
#if sequence needs to be reversed
reverse_seq=0
#in which part(s) the reads are used
asm_flags=3
```



```
#minimum aligned length to contigs for a reliable read location (at least 32 for short insert size)
map_len=52
#fastq file for read 1
q=SRR4296944.fastq
```

```
[LIB]
#maximal read length in this lib
rd_len_cutoff=150
#average insert size
avg_ins=0
#if sequence needs to be reversed
reverse_seq=0
#in which part(s) the reads are used
asm_flags=3
#minimum aligned length to contigs for a reliable read location (at least 32 for short insert size)
map_len=52
#fastq file for read 1
q=SRR4296942.fastq
```

```
[LIB]
#maximal read length in this lib
rd_len_cutoff=150
#average insert size
avg_ins=0
#if sequence needs to be reversed
reverse_seq=0
#in which part(s) the reads are used
asm_flags=3
#minimum aligned length to contigs for a reliable read location (at least 32 for short insert size)
map_len=52
#fastq file for read 1
q=SRR4296940.fastq
```

```
[LIB]
#maximal read length in this lib
rd_len_cutoff=150
#average insert size
avg_ins=0
#if sequence needs to be reversed
reverse_seq=0
#in which part(s) the reads are used
asm_flags=3
#minimum aligned length to contigs for a reliable read location (at least 32 for short insert size)
map_len=52
#fastq file for read 1
q=SRR4296938.fastq
```

```
[LIB]
#maximal read length in this lib
rd_len_cutoff=150
#average insert size
avg_ins=0
#if sequence needs to be reversed
reverse_seq=0
#in which part(s) the reads are used
asm_flags=3
#minimum aligned length to contigs for a reliable read location (at least 32 for short insert size)
map_len=52
#fastq file for read 1
q=SRR4296936.fastq
```

```
[LIB]
#maximal read length in this lib
rd_len_cutoff=150
#average insert size
avg_ins=0
#if sequence needs to be reversed
reverse_seq=0
#in which part(s) the reads are used
asm_flags=3
#minimum aligned length to contigs for a reliable read location (at least 32 for short insert size)
map_len=52
#fastq file for read 1
q=SRR4296934.fastq
```

```
[LIB]
#maximal read length in this lib
rd_len_cutoff=150
#average insert size
avg_ins=0
#if sequence needs to be reversed
reverse_seq=0
#in which part(s) the reads are used
asm_flags=3
#minimum aligned length to contigs for a reliable read location (at least 32 for short insert size)
map_len=52
#fastq file for read 1
q=SRR4296931.fastq
```

```
[LIB]
#maximal read length in this lib
rd_len_cutoff=150
#average insert size
avg_ins=0
#if sequence needs to be reversed
reverse_seq=0
#in which part(s) the reads are used
asm_flags=3
#minimum aligned length to contigs for a reliable read location (at least 32 for short insert size)
map_len=52
#fastq file for read 1
q=SRR4292306.fastq
```

```
[LIB]
#maximal read length in this lib
rd_len_cutoff=150
#average insert size
avg_ins=0
#if sequence needs to be reversed
reverse_seq=0
#in which part(s) the reads are used
asm_flags=3
#minimum aligned length to contigs for a reliable read location (at least 32 for short insert size)
map_len=52
#fastq file for read 1
q=SRR4292301.fastq
```

```
[LIB]
#maximal read length in this lib
rd_len_cutoff=150
```

```

#average insert size
avg_ins=0
#if sequence needs to be reversed
reverse_seq=0
#in which part(s) the reads are used
asm_flags=3
#minimum aligned length to contigs for a reliable read location (at least 32 for short insert size)
map_len=52
#fastq file for read 1
q=SRR4292299.fastq

[LIB]
#maximal read length in this lib
rd_len_cutoff=150
#average insert size
avg_ins=0
#if sequence needs to be reversed
reverse_seq=0
#in which part(s) the reads are used
asm_flags=3
#minimum aligned length to contigs for a reliable read location (at least 32 for short insert size)
map_len=52
#fastq file for read 1
q=SRR4292292.fastq

[LIB]
#maximal read length in this lib
rd_len_cutoff=150
#average insert size
avg_ins=0
#if sequence needs to be reversed
reverse_seq=0
#in which part(s) the reads are used
asm_flags=3
#minimum aligned length to contigs for a reliable read location (at least 32 for short insert size)
map_len=52
#fastq file for read 1
q=SRR4292206.fastq

```

### 3.7.2 *De novo* 65-mer female assembly with *SOAPdenovoTrans*

```

module load SOAPdenovoTrans

SOAPdenovo-Trans-127mer all -s soapconfig_trans.txt -K 65 -o TranscriptAssemblyK65 -p 16 1>
TranscriptAssemblyK65.stdout 2> TranscriptAssemblyK65.stderr

```

### 3.7.3 Improvement of the assembly of the W-Candidates using the *de novo* 65-mer female assembly

```

echo "### Step 4: Reassembly of Candidates"
module load blat

module load cap3/02-10-15

blat -minScore=50 TranscriptAssemblyK65.scafSeq
Japonicum_transcripts_filtered_by_coverage.fasta /dev/stdout | awk '($2/($1+
$2+0.00000001))<0.01)' | cut -f 14 | sort | uniq | ~/seqtk/seqtk subseq

```

```

TranscriptAssemblyK65.scafSeq /dev/stdin > K65_maptoyourcandidate.fa

cap3 K65_maptoyourcandidate.fa -h 80 -o 40

#merge cap3 output with the filtered transcripts
cat Japonicum_transcripts_filtered_by_coverage.fasta K65_maptoyourcandidate.fa.cap.contigs >
K65_plus_transcripts.fasta

#remove duplicates

perl SpliceFinder_2.pl K65_plus_transcripts.fasta

#Add SJ_W_ to the names of the transcripts
perl -p -e "s/^>/>SJ_W_/g" K65_plus_transcripts.fasta.long >
Final_Japonicum_W_transcripts_renamed.fasta

```

### 3.7.4 Using coverage analysis to filter the improved set of candidates

```

echo "### Step 5: Filtering Stage 2"
srunch bowtie2-build Final_Japonicum_W_transcripts_renamed.fasta transcripts_w

srunch bowtie2 -p 8 --no-unal --no-hd --no-sq -x transcripts_w -U SRR5054672_1.fastq -S mixed_1.sam
srunch bowtie2 -p 8 --no-unal --no-hd --no-sq -x transcripts_w -U SRR5054673_1.fastq -S mixed_2.sam
srunch bowtie2 -p 8 --no-unal --no-hd --no-sq -x transcripts_w -U SRR5054701_1.fastq -S mixed_3.sam
srunch bowtie2 -p 8 --no-unal --no-hd --no-sq -x transcripts_w -U SRR5054524_1.fastq -S male_1.sam
srunch bowtie2 -p 8 --no-unal --no-hd --no-sq -x transcripts_w -U SRR5054649_1.fastq -S male_2.sam
srunch bowtie2 -p 8 --no-unal --no-hd --no-sq -x transcripts_w -U SRR5054671_1.fastq -S male_3.sam
srunch bowtie2 -p 8 --no-unal --no-hd --no-sq -x transcripts_w -U SRR5054674_1.fastq -S male_4.sam

awk '($6=="100M")' mixed_1.sam | grep 'NM:i:0' > mixed_1_perfectmatch.sam
awk '($6=="100M")' mixed_2.sam | grep 'NM:i:0' > mixed_2_perfectmatch.sam
awk '($6=="100M")' mixed_3.sam | grep 'NM:i:0' > mixed_3_perfectmatch.sam
awk '($6=="100M")' male_1.sam | grep 'NM:i:0' > male_1_perfectmatch.sam
awk '($6=="100M")' male_2.sam | grep 'NM:i:0' > male_2_perfectmatch.sam
awk '($6=="100M")' male_3.sam | grep 'NM:i:0' > male_3_perfectmatch.sam
awk '($6=="100M")' male_4.sam | grep 'NM:i:0' > male_4_perfectmatch.sam

grep '>' Final_Japonicum_W_transcripts_renamed.fasta | perl -pi -e 's/>//gi' | perl -pi -e 's/ .*//gi' >
transcripts.list

cat mixed_1_perfectmatch.sam | cut -f 3 | cat /dev/stdin transcripts.list | sort | uniq -c | awk '{print
$2, $1-1}' > mixed_1_perfectmatch.counts

cat mixed_2_perfectmatch.sam | cut -f 3 | cat /dev/stdin transcripts.list | sort | uniq -c | awk '{print

```

```

$2, $1-1}' > mixed_2_perfectmatch.counts

cat mixed_3_perfectmatch.sam | cut -f 3 | cat /dev/stdin transcripts.list | sort | uniq -c | awk '{print $2, $1-1}' > mixed_3_perfectmatch.counts

cat male_1_perfectmatch.sam | cut -f 3 | cat /dev/stdin transcripts.list | sort | uniq -c | awk '{print $2, $1-1}' > male_1_perfectmatch.counts

cat male_2_perfectmatch.sam | cut -f 3 | cat /dev/stdin transcripts.list | sort | uniq -c | awk '{print $2, $1-1}' > male_2_perfectmatch.counts

cat male_3_perfectmatch.sam | cut -f 3 | cat /dev/stdin transcripts.list | sort | uniq -c | awk '{print $2, $1-1}' > male_3_perfectmatch.counts

cat male_4_perfectmatch.sam | cut -f 3 | cat /dev/stdin transcripts.list | sort | uniq -c | awk '{print $2, $1-1}' > male_4_perfectmatch.counts

Rscript merge_results.R

python contigs_list.py

perl -ne 'if(/^>(\S+)){$c=$i{$1}}$c?print:chomp;$i{$_}=1 if @ARGV' contigs_list.txt
Final_Japonicum_W_transcripts_renamed.fasta > final_w_japonicum.fasta

```

### 3.7.5 Generate a male transcriptome assembly and recover the “best hits” from it to avoid hybrid assemblies of ZW

```

#Trimming the reads:
module load java
srun java -jar ~/Trimmomatic-0.36/trimmomatic-0.36.jar PE -phred33 SRR8175618_1.fastq
SRR8175618_2.fastq SRR8175618_1_paired.fastq SRR8175618_1_unpaired.fastq
SRR8175618_2_paired.fastq SRR8175618_2_unpaired.fastq
ILLUMINACLIP:~/Trimmomatic-0.36/adapters/TruSeq3-PE.fa:2:30:10 LEADING:3 TRAILING:3
SLIDINGWINDOW:4:15 MINLEN:140

#Assembly using Trinity:

module load java
module load samtools/1.10
module load jellyfish/2.3.0
module load bowtie2/2.3.4.1
module load python/3.8.5
module load salmon/0.13.1

~/trinityrnaseq-v2.11.0/Trinity --seqType fa --left SRR8175618_1_paired_renamed.fasta --right
SRR8175618_2_paired_renamed.fasta --CPU XX --max_memory XXG

#Cap3

module load cap3/02-10-15

cap3 Trinity.fasta -h 80 -o 40

cat Trinity.fasta.cap.contigs Trinity.fasta.cap.singlets > Trinity_cap3.fasta

```

### 3.7.6 Identify the Z-homologs of our candidates

Extract the “best hits” from *Blat* alignment and using them as our putative Z:

```
echo "### Step 7: Finding the Z candidates"

module load blat
blat -minScore=50 Trinity_cap3.fasta final_w_japonicum.fasta W_vs_trinity.blat -t=dnax -q=dnax

sort -k 10 W_vs_trinity.blat > W_vs_trinity.blat.sorted

perl 2-besthitblat.pl W_vs_trinity.blat.sorted

cat W_vs_trinity.blat.sorted.besthit | awk '($1>100)' > filtered_z.txt

cat filtered_z.txt | cut -f 14 > names_z_candidates.txt

perl -ne 'if(/^(^>(\S+))){$c=$i{$1}}$c?print:chomp;$i{$_}=1 if @ARGV' names_z_candidates.txt
Trinity_cap3.fasta > Final_Set_Z_Candidates_japonicum.fasta
```

## Supplementary Code 4: Strata Identification

### 4.1 *De novo* determination of Z-specific regions in *S. mansoni*

#### 1.bowtie2\_mansoni.sh

Male (ERR562989) and female (ERR562990) DNA reads were aligned to the latest version of the *S. mansoni* genome (V7, release WBPS14, obtained from the WormBase Parasite database on the 30<sup>th</sup> of October 2020)

```
#!/bin/bash

# OPTIONS

#SBATCH --job-name="bowtie2"
#SBATCH --output=bowtie2_mansoni.out
#SBATCH --cpus-per-task=3
#SBATCH --mem=25G
#SBATCH --time=48:00:00

# MORE INFOS

#-# last edit: 30-10-2020
#-# usage: qsub 1.bowtie2_mansoni.sh
#-# prog required: bowtie (v2.3.4.1)

### START

inf=~ /path-to-the-reads"
genome=~ /path-to-the-genome/genome.fa"
ouf=~ /path-to-output"

mkdir $ouf
```

```

module load bowtie2/2.3.4.1

## building index

bowtie2-build -f $genome mansoni_index
mv mansoni_index* $ouf

## aligning

bowtie2 -x $ouf/mansoni_index -1 $inf/ERR562989_forward_paired.fq.gz -2
$inf/ERR562989_reverse_paired.fq.gz -p 3 -S $ouf/mansoni_males.sam

bowtie2 -x $ouf/mansoni_index -1 $inf/ERR562990_forward_paired.fq.gz -2
$inf/ERR562990_reverse_paired.fq.gz -p 3 -S $ouf/mansoni_females.sam

### END

```

## ***2.soapcov\_mansoni.sh***

*Bowtie2* outputs were filtered, and uniquely mapped reads were used as input for *soapcoverage* (analysis of genomic coverage)

```

#!/bin/bash

# OPTIONS

#SBATCH --job-name="soapcov"
#SBATCH --output=soapcov.out
#SBATCH --mem=50G
#SBATCH --time=24:00:00

# MORE INFOS

#-# last edit: 13-11-2020
#-# usage: qsub 2.soapcov_mansoni.sh
#-# prog required: soap coverage

### START

#load module

module load soap/coverage

#define variable
inf=~ /path-to-bowtie2-output"
genome=~ /path-to-the-genome/genome.fa"
ouf=~ /path-to-output/" # do not forget the final "/"
win=10000

mkdir $ouf

#Select only uniquely mapped reads

cd $inf

for i in `ls | grep .sam`
do
grep -vw 'XS:i' ${i} > ${i}_unique.sam

```

```

done

#Obtain average genomic coverage for each scaffold

cd $inf

for I in `ls | grep _unique.sam`
do
soap.coverage -sam -cvg -i ${I} -onlyuniq -refsingle $genome -o $ouf/${I}.soapcov -window $ouf/${I}.win10.soapcov 10000
done

### END

```

### 3.Zregions\_Smansoni.R

Male and female genomic coverages were compared in order to define F:M threshold values (Pipeline illustrated in Sup. Figure 13)

```

### PART I ### DEFINING F:M COVERAGE LIMITS OF Z-SPECIFIC REGIONS IN S. MANSONI

### STEP1: Loci assignment based on 2.5% coverage of autosomes

## Set-up parameters
output="~/path-to-output" ## Here indicate your outputfile
spe="Smans" ##Here indicate the abbreviation of the studied species

## Read data
x=read.table("~/path-to-input/InputFile1_Smansoni_SoapCov_By10kb_ForR_NewG.csv",h=T) ##Here
indicate your input table (5 columns modified SoapCoverage output)
head(x) #5columns: $Scaffold_ID $Window_start $Window_stop $ERR562990_Depth (i.e. female
coverage) $ERR562989_Depth (i.e. male coverage)
tail(x) #5columns
nrow(x) #40958rows==number of analysed windows out of SoapCoverage analysis

## Calculate Log2(F:Mcov)
x$log2_FMcoverage <- log2(x$ERR562990_Depth/x$ERR562989_Depth)
head(x) #6columns: 6th column=="log2_FMcoverage"

## Histogram - Overall genomic coverage distribution
hist(x$log2_FMcoverage, breaks=400, xlim=c(-2,2), ylim=c(0,6000), col="antiquewhite3",
main="F:M coverage distribution - S. mansoni", xlab="log2 (F:M) ratio of coverage")

## Subset depending on the location
x_Autosomes <- subset(x, x$Scaffold_ID=='SM_V7_1' | x$Scaffold_ID=='SM_V7_2' |
x$Scaffold_ID=='SM_V7_3' | x$Scaffold_ID=='SM_V7_4' |x$Scaffold_ID=='SM_V7_5' |
x$Scaffold_ID=='SM_V7_6' |x$Scaffold_ID=='SM_V7_7')
head(x_Autosomes) #6columns
tail(x_Autosomes) #6columns
nrow(x_Autosomes) #30429rows
x_ZW <- subset(x, x$Scaffold_ID=='SM_V7_ZW') ## Just to insure that the sum of nrow are correct
nrow(x_ZW) #8839
x_UP <- subset(x, x$Scaffold_ID!='SM_V7_1' & x$Scaffold_ID!='SM_V7_2' & x$Scaffold_ID!
=='SM_V7_3' & x$Scaffold_ID!='SM_V7_4' & x$Scaffold_ID!='SM_V7_5' & x$Scaffold_ID!='SM_V7_6' &
x$Scaffold_ID!='SM_V7_7' & x$Scaffold_ID!='SM_V7_8')
nrow(x_UP) #10529

## Determining minCov_Aut & maxCov_Aut
maxCov_Aut <- quantile(x_Autosomes$log2_FMcoverage,0.975,na.rm=T)

```



```

maxCov_Aut
maxCov_Aut_Graph <- round(maxCov_Aut,digits = 4)
minCov_Aut <- quantile(x_Autosomes$log2_FMcoverage,0.025,na.rm=T) ##### Further used limit
minCov_Aut
minCov_Aut_Graph <- round(minCov_Aut,digits = 4)

## Histogram - Autosomes
hist(x_Autosomes$log2_FMcoverage, breaks=600, xlim=c(-1,1), ylim=c(0,2500),
col="gray37",border="gray50", main="F:M coverage distribution - Autosomes", xlab="log2 (F:M)
ratio of coverage")
abline(v=maxCov_Aut,col="gray37",lwd=2,lty=2)
abline(v=minCov_Aut,col="sienna2",lwd=2,lty=2)
text((minCov_Aut_Graph-0.05),1000,paste("2.5%min_Aut: ",
minCov_Aut_Graph),srt=90,col="sienna2")
text((maxCov_Aut_Graph-0.05),1000,paste("2.5%max_Aut: ",
maxCov_Aut_Graph),srt=90,col="gray37")

## Visualizing first step filter

# Subset Chr_ZW
x_ZW <- subset(x, x$Scaffold_ID=='SM_V7_ZW')

# Define color
colFactor <- x_ZW$log2_FMcoverage
colF <- rep("antiquewhite2",length(colFactor)) ; colF[which(colFactor>(minCov_Aut))] <- "gray37" ;
colF[which(colFactor<(minCov_Aut))] <- "sienna2"
colF

# Plot coverage ratio F:M
plot(as.numeric(paste(x_ZW$Window_start)),
log2(as.numeric(paste(x_ZW$ERR562990_Depth))/as.numeric(paste(x_ZW$ERR562989_Depth))),
col=colF, ylim=c(-2,2), pch=16, xlab='Position on the Z-chromosome', ylab='log2 (F:M) ratio of
coverage', main="F:M coverage along S. mansoni Z-chromosome")
legend(x="bottomright",paste(c("2.5% min_Aut","PAR","Non-
PAR")),pch=c(NA,16,16),lty=c(2,NA,NA),lwd=c(2,NA,NA),col=c("sienna2","gray37","sienna2"),bty="
n")
abline(h=minCov_Aut, col="sienna2", lty=2, lw=2)

## Generating first step table

# Define flags
Z <- which((x_ZW$log2_FMcoverage) < minCov_Aut)
PAR <- which((x_ZW$log2_FMcoverage) > minCov_Aut)
flag <- rep("Ambiguous",nrow(x_ZW)) ; flag[Z] <- "Z" ; flag[PAR] <- "PAR"
x_ZW <- cbind(x_ZW,flag)
head(x_ZW)
nrow(x_ZW) #8839
nrow(subset(x_ZW,x_ZW$flag=="PAR")) #5431
nrow(subset(x_ZW,x_ZW$flag=="Z")) #3337
nrow(subset(x_ZW,x_ZW$flag=="Ambiguous")) #71

#Write filtered final table with flags
coln=NULL ; for(j in 1:length(colnames(x_ZW))){coln <- c(coln,paste(colnames(x_ZW)
[j],spe,sep="_"))}
write.table(x_ZW,paste(output,"InputFile2_Zonly_10kb",".txt",sep=""),col.names=coln,row.names=F
)

### STEP2: Loci assignment based on 1% coverage of Z-candidates

```

```

## Read data
x_Z=read.table(paste(output,"InputFile2_Zonly_10kb",".txt",sep=""),h=T,fill=TRUE)
head(x_Z) #7columns: 7th column=="flag_Smans"
x_Z <- subset(x_Z, x_Z$flag_Smans=="Z")
head(x_Z) #7columns: 7th column=="flag_Smans" should be only Z
tail(x_Z) #7columns
nrow(x_Z) #3337

## Determining minCov_Aut & maxCov_Aut
maxCov_Z <- quantile(x_Z$log2_FMcoverage_Smans,0.99,na.rm=T)
maxCov_Z #-0.3541866
maxCov_Z_Graph <- round(maxCov_Z,digits = 4)
minCov_Z <- quantile(x_Z$log2_FMcoverage_Smans,0.01,na.rm=T) ##### What's matter
minCov_Z #-1.101588
minCov_Z_Graph <- round(maxCov_Z,digits = 4)

## Histogram - Z chromosome
hist(x_Z$log2_FMcoverage_Smans, breaks=100, xlim=c(-2,0), ylim=c(0,200), col="sienna2",
border="sienna1", main="F:M coverage distribution - Non-autosomes", xlab="log2 (F:M) ratio of
coverage")
abline(v=maxCov_Z,col="gray37",lwd=2,lty=2)
abline(v=minCov_Z,col="sienna2",lwd=2,lty=2)
text(-1.15,100,paste("1%min_Z: ", minCov_Z_Graph),srt=90,col="sienna2")
text(-0.43,100,paste("1%max_Z: ", maxCov_Z_Graph),srt=90,col="gray37")

## Visualizing second step filter
x=read.table("~/path-to-input/InputFile1_Smansoni_SoapCov_By10kb_ForR_NewG.csv",h=T) ##Here
indicate your input table (5 columns modified SoapCoverage output)
x$log2_FMcoverage <- log2(x$ERR562990_Depth/x$ERR562989_Depth)
x_ZW <- subset(x, x$Scaffold_ID=='SM_V7_ZW')

# Plot coverage ratio F:M with ambiguous regions based on coverage only
colFactor <- x_ZW$log2_FMcoverage
colF <- rep("antiquewhite2",length(colFactor)) ; colF[which(colFactor>(minCov_Aut))] <- "gray37" ;
colF[which(colFactor<(maxCov_Z))] <- "sienna2"
plot(as.numeric(paste(x_ZW$Window_start)),
log2(as.numeric(paste(x_ZW$ERR562990_Depth))/as.numeric(paste(x_ZW$ERR562989_Depth))),
col=colF,pch=16, ylim=c(-2,2), xlab='Position on the Z-chromosome', ylab='log2 (F:M) ratio of
coverage', main="F:M genomic coverage distribution along S. mansoni Z-chromosome")
abline(h=minCov_Aut, col="sienna2", lty=2, lwd=2)
abline(h=maxCov_Z, col="gray37", lty=2, lwd=2)
legend(x="bottomright",paste(c("2.5% min_Aut","1% max_Z","Non-
Zlinked","Zlinked","Ambiguous")),pch=c(NA,NA,16,16,16),lty=c(2,2,NA,NA,NA),lwd=c(2,2,NA,NA,NA)
,col=c("sienna2","gray37","gray37","sienna2","antiquewhite2"),bty="n")

```

#### ***4.GeneSelector.pl***

We applied the above determined threshold to the entire ZW linkage group and the final classification of Z-specific and pseudoautosomal regions is reported in Sup. Dataset 5 (sheet #1). In this table, we corrected the Z-specific content by systematically excluding windows for which the coverage value is not consistent with the adjacent windows : we added them to the category named « ambiguous ». Finally, annotated CDS were individually assigned to the Z or the PAR region, based on their coordinates. When a gene overlapped with an ambiguous window, it was tagged « ambiguous » as well thanks to the 4.GeneSelector.pl script below.

```

#!/usr/bin/perl

print "input are: a list of coordinates to exclude ($start $space $end), and a CDS file ($genename
$chrom $start $end)";
print "usage: perl 4.GeneSelector.pl InputFile3_windows-to-exclude.csv InputFile4_mansoni-gene-
coordinates.cnv\n";

my $input = $ARGV[0];
my $ensembl = $ARGV[1];
open (INPUT, "$input");
open (GENES, "$ensembl");
open (RESULTS, ">>$ensembl.Windows.txt");

while ($line = <INPUT>) {
    push (@windows, $line);
}

while ($gline = <GENES>)
{
    chomp $gline;
    chomp $gline;
    $gline =~ s/\n//g;
    ($gene, $chrom, $start, $end)=split(/\t/, $gline);
    if ($gene ne "Gene_ID")
    {
        foreach $window (@windows)
        {
            ($winchrom, $winstart, $winend)=split(/\t/, $window);
            if ($chrom eq $winchrom)
            {
                if (($start>$winstart && $start<$winend) || ($end>$winstart &&
$end<$winend) || ($start<$winstart && $end>$winend))
                {
                    print RESULTS "$gline\n";
                }
            }
            else
            {
            }
        }
    }
}
else {}
}

```

## 4.2 Inference of the location of *S. japonicum* scaffolds along the *S. mansoni* Z-chromosome

### 5. *blat.sh*

We mapped *S. mansoni* CDS to *S. japonicum* scaffolds (obtained from the WormBase Parasite database on the 30<sup>th</sup> of October 2020), using *blat* with a translated query and database.

```

#!/bin/bash
#SBATCH --job-name="blat"
#SBATCH --mem=50G
#SBATCH --time=48:00:00

```

```

#SBATCH --output=1.blat.out

#-# last edit: 30-10-2020
#-# usage: qsub 5.blat.sh
#-# prog required: BLAT_v36x1
#-# description: Align with BLAT

## define variables:
CDS="~/path-to-mansoni-CDS/schistosoma_mansoni.PRJEA36577.WBPS14.CDS_transcripts.fa"
GENOME="~/path-to-japonicum-genome/schistosoma_japonicum.PRJEA34885.WBPS14.genomic.fa"

### start

module load blat/20170224

blat -q=dnax -t=dnax -minScore=50 ${GENOME} ${CDS} GENOMEjap_CDSmans.blat

sort -k 10 GENOMEjap_CDSmans.blat > GENOMEjap_CDSmans.blat.sorted

### end

```

### 6.besthitblat.pl

The BLAT alignment was then filtered to keep only the mapping hit with the highest score for each *S. mansoni* CDS.

```

#!/usr/bin/perl
print "make sure your input file is sorted by scaffoldname! sort -k 10";
my $input = $ARGV[0];

open (INPUT, "$input");
open (RESULTS, ">>$input.besthit");

print RESULTS "1match\tmismatch\trep\tNs\tQgapcount\tQgapbases\tTgapcount\tTgapbases\tstrand\tQname\tQsize\tQstart\tQend\tTname\tTsize\tTstart\tTend\tblockcount\tblockSizes\tqStarts\ttStarts\n";

$name0="";
$score0=0;
$line0="";

while ($line = <INPUT>) {
($match, $mismatch, $rep, $Ns, $Qgapcount, $Qgapbases, $Tgapcount, $Tgapbases, $strand, $Qname, $Qsize, $Qstart, $Qend, $Tname, $Tsize, $Tstart, $Tend, $blockcount, $blockSizes, $qStarts, $tStarts)=split(/\t/, $line);

    if ($Qname eq $name0)
    {
        if ($match > $score0)
        {
            $name0=$Qname;
            $score0=$match;
            $line0=$line;
        }
    }
    else
    {
        {
        }
    }
}
}

```

```

else
{
    print RESULTS $line0;
    $name0=$Qname;
    $score0=$match;
    $line0=$line;

}

}

print RESULTS $line0;

system "perl -pi -e 's/^[^0-9].*//gi' $input.besthit";
system "perl -pi -e 's/1match/match/gi' $input.besthit";
system "perl -pi -e 's/^\n//gi' $input.besthit";

```

### 7.blatreverse.pl

When several *S. mansoni* genes overlapped on the *S. japonicum* genome by more than 20 bp, we kept only the highest mapping score.

```

#!/usr/bin/perl

#this program is meant to remove overlapping contigs from blat results
#by reciprocal best blatx hit
#when contigs overlap on target, the one with the highest score is kept (unless the overlap <20bps)

#the input file should be a best hit blat file:
#match      mismatch      rep      Ns      Qgapcount      Qgapbases      Tgapcount
      Tgapbases      strand      Qname      Qsize      Qstart      Qend      Tname      Tsize      Tstart      Tend
      blockcount      blockSizes      qStarts      tStarts
#and sorted by Tname!!! sort -k 14!!!

#usage: perl 7.blatreverse.pl besthit-output.sorted

print "make sure your input file is sorted by Tname -k 14!";
my $input = $ARGV[0];

open (INPUT, "$input");
open (RESULTS, ">>$input.nonredundant");

$name0="lalala";
system "echo 'lalala' >> lalala.temp";

while ($line = <INPUT>)
{
    ($blat_score, $mismatch, $rep, $Ns, $Qgapcount, $Qgapbases, $Tgapcount, $Tgapbases,
    $strand, $Qname, $Qsize, $Qstart, $Qend, $Tname, $Tsize, $Tstart, $Tend, $blockcount,
    $blockSizes, $qStarts, $tStarts)=split(/\t/, $line);

    if ($Tname eq $name0)
    {
        open (TEMP, ">>$Tname.temp");
        print TEMP $line;
        close(TEMP);
    }
    else

```

```

{

#first let's deal with gene name0

#let's find non-overlapping contigs for genes name0
$sortname="\Q$name0\E";
system "sort -nr -k 1 $sortname.temp >> $sortname.temp.sorted";
open(TEMPREAD, "$name0.temp.sorted") or die "could not open tempread";
print "just opened $name0.temp.sorted\n";
@start="";
@end="";
@counts="";
$counter=0;

while ($tempread = <TEMPREAD>)
{
print "counter $counter\n";
$verifier=0;
($blatscore, $mismatch, $rept, $Nst, $Qgapcount, $Qgapbase,
$Tgapcount, $Tgapbase, $strand, $Qname, $Qsize, $Qstart, $Qend, $Tname, $Tsize,
$Tstart, $Tend, $blockcount, $blocksize, $qstart, $tstart)=split(/\t/, $tempread);

if ($counter==0)
{
print RESULTS $tempread;
push (@start, $Tstart);
push (@end, $Tend);
$counter=$counter+1;
push (@counts, $counter);
}
elseif ($counter>0)
{
print "starts: @start\n";
print "counts: @counts\n";

#let's test if the contig overlaps contigs with higher scores
foreach $count (@counts)

{
$Ne_start="";
$Ne_end="";

#allow for 20bp overlap
#But first make sure there is something in $count, it seems
to run the cycle on empty count first
if ($count ne "")
{
$Ne_start=$start[$count]+20;
$Ne_end=$end[$count]-20;
}
else
{
$verifier=0;
}

print "count $count start $Tstart end $Tend teststart

```

```

$Ne_start testend $Ne_end verifier $verifier\n";
    if ($Tstartt >= $Ne_start && $Tstartt <= $Ne_end)
        {
            $verifier=$verifier+1;
        }
    elseif ($Tendt >= $Ne_start && $Tendt <= $Ne_end)
        {
            $verifier=$verifier+1;
        }
    elseif ($Tstartt <= $Ne_start && $Tendt >= $Ne_end)
        {
            $verifier=$verifier+1;
        }
    else
        {
            $verifier=$verifier+0;
        }
    }

    if ($verifier==0)
        {
            print RESULTS $tempread;
            push (@start, $Tstartt);
            push (@end, $Tendt);

            $counter=$counter+1;
            push(@counts, $counter);
        }
    else
        {
            #push (@start, $Tstartt);
            #push (@end, $Tendt);
            # $counter=$counter+1;
            #push(@counts, $counter);
        }
    }

}

close(TEMPREAD);
system "rm \Q$name0\E.temp";
system "rm \Q$name0\E.temp.sorted";

$name0=$Tname;

#finally let's start filling the new file
open (TEMP, ">>$Tname.temp");
print TEMP $line;
close(TEMP);
}
}

```

## Supplementary Code 5: A description of the process we followed to perform the $F_{ST}$ analysis, from identifying the sex of the Miracidia samples to calculating $F_{ST}$

### 5.1 Read Counts for the W candidates

We added three autosomal sequences Sjp\_0046990, Sjp\_0099780, Sjp\_0101650 (chosen randomly) to the W candidates in *S. japonicum*:

```
module load bowtie2/2.3.4.1
module load soap/coverage

srun bowtie2-build Final_Set_W_Candidates_japonicum_plus_autosomes.fasta japonicum_W
srun bowtie2 -p 20 --no-unal --no-hd --no-sq -x japonicum_W -U SRR12363890_1.fastq -S s_1.sam
srun bowtie2 -p 20 --no-unal --no-hd --no-sq -x japonicum_W -U SRR12363891_1.fastq -S s_2.sam
srun bowtie2 -p 20 --no-unal --no-hd --no-sq -x japonicum_W -U SRR12363892_1.fastq -S s_3.sam
srun bowtie2 -p 20 --no-unal --no-hd --no-sq -x japonicum_W -U SRR12363893_1.fastq -S s_4.sam
srun bowtie2 -p 20 --no-unal --no-hd --no-sq -x japonicum_W -U SRR12363894_1.fastq -S s_5.sam
srun bowtie2 -p 20 --no-unal --no-hd --no-sq -x japonicum_W -U SRR12363895_1.fastq -S s_6.sam
srun bowtie2 -p 20 --no-unal --no-hd --no-sq -x japonicum_W -U SRR12363896_1.fastq -S s_7.sam
srun bowtie2 -p 20 --no-unal --no-hd --no-sq -x japonicum_W -U SRR12363897_1.fastq -S s_8.sam
srun bowtie2 -p 20 --no-unal --no-hd --no-sq -x japonicum_W -U SRR12363898_1.fastq -S s_9.sam
srun bowtie2 -p 20 --no-unal --no-hd --no-sq -x japonicum_W -U SRR12363899_1.fastq -S s_10.sam
srun bowtie2 -p 20 --no-unal --no-hd --no-sq -x japonicum_W -U SRR12363900_1.fastq -S s_11.sam
srun bowtie2 -p 20 --no-unal --no-hd --no-sq -x japonicum_W -U SRR12363901_1.fastq -S s_12.sam
srun bowtie2 -p 20 --no-unal --no-hd --no-sq -x japonicum_W -U SRR12363902_1.fastq -S s_13.sam
srun bowtie2 -p 20 --no-unal --no-hd --no-sq -x japonicum_W -U SRR12363903_1.fastq -S s_14.sam
srun bowtie2 -p 20 --no-unal --no-hd --no-sq -x japonicum_W -U SRR12363904_1.fastq -S s_15.sam
srun bowtie2 -p 20 --no-unal --no-hd --no-sq -x japonicum_W -U SRR12363905_1.fastq -S s_16.sam
srun bowtie2 -p 20 --no-unal --no-hd --no-sq -x japonicum_W -U SRR12363906_1.fastq -S s_17.sam
srun bowtie2 -p 20 --no-unal --no-hd --no-sq -x japonicum_W -U SRR12363907_1.fastq -S s_18.sam
srun bowtie2 -p 20 --no-unal --no-hd --no-sq -x japonicum_W -U SRR12363908_1.fastq -S s_19.sam
srun bowtie2 -p 20 --no-unal --no-hd --no-sq -x japonicum_W -U SRR12363909_1.fastq -S s_20.sam
srun bowtie2 -p 20 --no-unal --no-hd --no-sq -x japonicum_W -U SRR12363910_1.fastq -S s_21.sam
```



```

srun bowtie2 -p 20 --no-unal --no-hd --no-sq -x japonicum_W -U SRR12363911_1.fastq -S s_22.sam

for ((i=1; i<=22;i++))
do
awk '($6=="151M")' s_"$i".sam | grep 'NM:i:0' > s_"$i"_perfectmatch.sam
done

grep '>' Final_Set_W_Candidates_japonicum_plus_autosomes.fasta | perl -pi -e 's/>//gi' | perl -pi -e 's/
.*//gi' > japonicum_W.list

for ((i=1;i<=22;i++))
do

cat s_"$i"_perfectmatch.sam | cut -f 3 | cat /dev/stdin japonicum_W.list | sort | uniq -c | awk '{print
$2, $1-1}' > s_"$i"_perfectmatch.counts

cat s_"$i".sam | cut -f 3 | cat /dev/stdin japonicum_W.list | sort | uniq -c | awk '{print $2, $1-1}' >
s_"$i".counts

done

```

## 5.2 Genomic Coverage

```

module load java

module load bowtie2/2.3.4.1
module load soap/coverage

srun bowtie2-build schistosoma_japonicum.PRJEA34885.WBPS9.genomic.fa japonicum_genome

bowtie2 -x japonicum_genome -1 SRR12363890_1.fastq -2 SRR12363890_2.fastq --end-to-end --
sensitive -p 8 -S 1.sam

bowtie2 -x japonicum_genome -1 SRR12363891_1.fastq -2 SRR12363891_2.fastq --end-to-end --
sensitive -p 8 -S 2.sam

bowtie2 -x japonicum_genome -1 SRR12363892_1.fastq -2 SRR12363892_2.fastq --end-to-end --
sensitive -p 8 -S 3.sam

bowtie2 -x japonicum_genome -1 SRR12363893_1.fastq -2 SRR12363893_2.fastq --end-to-end --
sensitive -p 8 -S 4.sam

bowtie2 -x japonicum_genome -1 SRR12363894_1.fastq -2 SRR12363894_2.fastq --end-to-end --
sensitive -p 8 -S 5.sam

bowtie2 -x japonicum_genome -1 SRR12363895_1.fastq -2 SRR12363895_2.fastq --end-to-end --
sensitive -p 8 -S 6.sam

bowtie2 -x japonicum_genome -1 SRR12363896_1.fastq -2 SRR12363896_2.fastq --end-to-end --
sensitive -p 8 -S 7.sam

bowtie2 -x japonicum_genome -1 SRR12363897_1.fastq -2 SRR12363897_2.fastq --end-to-end --
sensitive -p 8 -S 8.sam

```

```

bowtie2 -x japonicum_genome -1 SRR12363898_1.fastq -2 SRR12363898_2.fastq --end-to-end --
sensitive -p 30 -S 9.sam

bowtie2 -x japonicum_genome -1 SRR12363899_1.fastq -2 SRR12363899_2.fastq --end-to-end --
sensitive -p 30 -S 10.sam

bowtie2 -x japonicum_genome -1 SRR12363900_1.fastq -2 SRR12363900_2.fastq --end-to-end --
sensitive -p 30 -S 11.sam

bowtie2 -x japonicum_genome -1 SRR12363901_1.fastq -2 SRR12363901_2.fastq --end-to-end --
sensitive -p 30 -S 12.sam

bowtie2 -x japonicum_genome -1 SRR12363902_1.fastq -2 SRR12363902_2.fastq --end-to-end --
sensitive -p 30 -S 13.sam

bowtie2 -x japonicum_genome -1 SRR12363903_1.fastq -2 SRR12363903_2.fastq --end-to-end --
sensitive -p 30 -S 14.sam

bowtie2 -x japonicum_genome -1 SRR12363904_1.fastq -2 SRR12363904_2.fastq --end-to-end --
sensitive -p 30 -S 15.sam

bowtie2 -x japonicum_genome -1 SRR12363905_1.fastq -2 SRR12363905_2.fastq --end-to-end --
sensitive -p 30 -S 16.sam

bowtie2 -x japonicum_genome -1 SRR12363906_1.fastq -2 SRR12363906_2.fastq --end-to-end --
sensitive -p 30 -S 17.sam

bowtie2 -x japonicum_genome -1 SRR12363907_1.fastq -2 SRR12363907_2.fastq --end-to-end --
sensitive -p 30 -S 18.sam

bowtie2 -x japonicum_genome -1 SRR12363908_1.fastq -2 SRR12363908_2.fastq --end-to-end --
sensitive -p 30 -S 19.sam

bowtie2 -x japonicum_genome -1 SRR12363909_1.fastq -2 SRR12363909_2.fastq --end-to-end --
sensitive -p 30 -S 20.sam

bowtie2 -x japonicum_genome -1 SRR12363910_1.fastq -2 SRR12363910_2.fastq --end-to-end --
sensitive -p 30 -S 21.sam

bowtie2 -x japonicum_genome -1 SRR12363911_1.fastq -2 SRR12363911_2.fastq --end-to-end --
sensitive -p 30 -S 22.sam

for ((i=1; i<=22;i++))
do
grep -vw "XS:i" "$i".sam > "$i"_unique.sam
soap.coverage -sam -cvg -i "$i"_unique.sam -onlyuniq -p 8 -refsingle
schistosoma_japonicum.PRJEA34885.WBPS9.genomic.fa -o "$i"_unique.soapcov
done

```

### 5.3 Converting SAM files to sorted bam

```

module load java
module load bwa
module load samtools
for ((i=19; i<=22;i++))
do
srun samtools view -bS "$i".sam | samtools sort /dev/stdin -o "$i".sorted.bam
done

```

## 5.4 SNP calling

```
module load java
module load samtools
module load bcftools
module load vcftools

#first index the transcriptome
srun samtools faidx schistosoma_japonicum.PRJEA34885.WBPS9.genomic.fa

#Call SNPs from the BAM alignments
srun bcftools mpileup -a AD,DP,SP -Ou -f schistosoma_japonicum.PRJEA34885.WBPS9.genomic.fa
1.sorted.bam 2.sorted.bam 3.sorted.bam 4.sorted.bam 5.sorted.bam 7.sorted.bam 9.sorted.bam
10.sorted.bam 11.sorted.bam 12.sorted.bam 13.sorted.bam 14.sorted.bam 15.sorted.bam
16.sorted.bam 18.sorted.bam 19.sorted.bam 20.sorted.bam 21.sorted.bam 22.sorted.bam | bcftools
call -v -f GQ,GP -mO z -o head.vcf.gz --threads 30
#filter for quality and coverage
srun vcftools --gzvcf head.vcf.gz --remove-indels --maf 0.1 --max-missing 0.9 --minQ 30 --min-
meanDP 10 --max-meanDP 100 --minDP 10 --maxDP 100 --recode --stdout > head_filtered.vcf
#Filter 2: remove multiallelic
bcftools view --max-alleles 2 --exclude-types indels head_filtered.vcf > head_filtered2.vcf
srun vcftools --vcf head_filtered2.vcf --weir-fst-pop population_1.txt --weir-fst-pop population_2.txt --
out pop1_vs_pop2
```

## 5.5 Population\_1.txt (males)

```
1.sorted.bam
2.sorted.bam
3.sorted.bam
4.sorted.bam
7.sorted.bam
10.sorted.bam
13.sorted.bam
14.sorted.bam
16.sorted.bam
18.sorted.bam
22.sorted.bam
```

## 5.6 population\_2.txt (females)

```
5.sorted.bam
9.sorted.bam
11.sorted.bam
12.sorted.bam
15.sorted.bam
19.sorted.bam
20.sorted.bam
21.sorted.bam
```

## 5.7 mean $F_{ST}$ per scaffold in R

```
fst<-read.table("pop1_vs_pop2.weir.fst", head=T, sep="\t")
fst_scaf<-aggregate(fst$WEIR_AND_COCKERHAM_FST, by=list(scaffold=fst$CHROM), mean)
colnames(fst_scaf)<-c("scaffold", "mean_fst")
write.table(fst_scaf, file="pop1_vs_pop2_MEANfst.txt", quote=F, row.names = F)
```

## Supplementary Code 6: CNV analysis with control-FREEC

### 6.1 Read mapping to *S. japonicum* genome

Bowtie2 (v2.2.9) was used to map two genomic libraries (SRR6841388 for females and SRR6841389 for males) against *S. japonicum* reference genome (schistosoma\_japonicum.PRJEA34885.WBPS9.genomic.fa, downloaded from wormbase parasite in Sept. 2017), as described in Picard *et al.*, Elife, 2018 (doi: 10.7554/eLife.35684).

### 6.2 CNV prediction with control-FREEC

Only mapped reads were extracted from the Bowtie2 output and resulting sam files were sorted before to be used as input for the CNV prediction. The script named *2.controlFREEC.sh* is the same for the three analyses, but the config file changes depending on the used window size (1kb, 5kb or 10kb). A file with the *S. japonicum* length (below named *jap\_scaff\_length*) is also needed as input.

#### *2.controlFREEC.sh*

```
#!/bin/bash
#SBATCH --job-name=controlFREEC
#SBATCH -c 20
#SBATCH --time=72:00:00
#SBATCH --mem=500G

#-# last edit: 12-4-21

##MODULE(S)

module load samtools/1.11

##VARIABLE(S)

config="3.controlFREE.config"

###START

srun FREEC-11.6/src/freec -conf ${config}

###END
```

#### *3.controlFREEC.config*

```
[general]
maxThreads=20
chrLenFile=~ /path-to-input-file/jap_scaff_length
ploidy=1,2
window=1000 #here change for 5000 or 10000 if needed
```

```

[sample]

mateFile=~ /path-to-bowtie2output/japonicum_females.sam
inputFormat=SAM
mateOrientation=FR

[control]

mateFile=~ /path-to-bowtie2output/japonicum_males.sam
inputFormat=SAM
mateOrientation=FR

[BAF]

[target]

```

### 6.3 Significance assessment

After the CNV prediction test, a significance test was run on the predicted CNVs thanks to a R script provided with control-FREEC and copied below.

#### *4.assess\_significance.R [script provided with the controlFREEC-11.6 package]*

```

#!/usr/bin/env Rscript

library(rtracklayer)

args <- commandArgs()

dataTable <- read.table(args[5], header=TRUE);
ratio<-data.frame(dataTable)

dataTable <- read.table(args[4], header=FALSE)
cnvs<- data.frame(dataTable)

ratio$Ratio[which(ratio$Ratio== -1)]=NA

cnvs.bed=GRanges(cnvs[,1],IRanges(cnvs[,2],cnvs[,3]))
ratio.bed=GRanges(ratio$Chromosome,IRanges(ratio$Start,ratio$Start),score=ratio$Ratio)

overlaps <- subsetByOverlaps(ratio.bed,cnvs.bed)
normals <- setdiff(ratio.bed,cnvs.bed)
normals <- subsetByOverlaps(ratio.bed,normals)

#mu <- mean(score(normals),na.rm=TRUE)
#sigma<- sd(score(normals),na.rm=TRUE)

#hist(score(normals),n=500,xlim=c(0,2))
#hist(log(score(normals)),n=500,xlim=c(-1,1))

#shapiro.test(score(normals)[which(!is.na(score(normals)))][5001:10000])
#qqnorm (score(normals)[which(!is.na(score(normals)))],ylim=(c(0,10)))
#qqline(score(normals)[which(!is.na(score(normals)))], col = 2)

#shapiro.test(log(score(normals))[which(!is.na(score(normals)))][5001:10000])
#qqnorm (log(score(normals))[which(!is.na(score(normals)))],ylim=(c(-6,10)))
#qqline(log(score(normals))[which(!is.na(score(normals)))], col = 2)

```

```

numberOfCol=length(cnvs)

for (i in c(1:length(cnvs[,1]))) {
  values <- score(subsetByOverlaps(ratio.bed,cnvs.bed[i]))
  #wilcox.test(values,mu=mu)
  W <- function(values,normal){resultw <- try(wilcox.test(values,score(normal)), silent = TRUE)
  if(class(resultw)=="try-error")
return(list("statistic"=NA,"parameter"=NA,"p.value"=NA,"null.value"=NA,"alternative"=NA,"method"
=NA,"data.name"=NA)) else resultw}
  KS <- function(values,normal){resultks <- try(ks.test(values,score(normal)), silent = TRUE)
  if(class(resultks)=="try-error")
return(list("statistic"=NA,"p.value"=NA,"alternative"=NA,"method"=NA,"data.name"=NA)) else
resultks}
  #resultks <- try(KS <- ks.test(values,score(normal)), silent = TRUE)
  # if(class(resultks)=="try-error") NA) else resultks
  cnvs[i,numberOfCol+1]=W(values,normal)$p.value
  cnvs[i,numberOfCol+2]=KS(values,normal)$p.value
}

if (numberOfCol==5) {
  names(cnvs)=c("chr","start","end","copy
number","status","WilcoxonRankSumTestPvalue","KolmogorovSmirnovPvalue")
}
if (numberOfCol==7) {
  names(cnvs)=c("chr","start","end","copy
number","status","genotype","uncertainty","WilcoxonRankSumTestPvalue","KolmogorovSmirnovPval
ue")
}
if (numberOfCol==9) {
  names(cnvs)=c("chr","start","end","copy
number","status","genotype","uncertainty","somatic/germline","percentageOfGermline","WilcoxonRa
nkSumTestPvalue","KolmogorovSmirnovPvalue")
}
write.table(cnvs, file=paste(args[4],".p.value.txt",sep=""),sep="\t",quote=F,row.names=F)

```

#### 6.4 Identification of genes overlapping deletions

Only the predicted CNVs with a wilcoxon p-value < 0.05 and a “loss” tag were further analyzed: we identified the genes overlapping the deleted windows thanks to the perl script *5.gene-selector.pl*. This step was done three times, for each window size: the input file named below “*windows-with-loss.csv*” corresponds to the three first columns of the control-FREEC outputs “*CNVtable\_onlysign\_loss\_controlFREECoutput.csv*” (One output for each window size) provided as Sup. Dataset 16. The input named “*japonicum-gene-coordinates.csv*” corresponds to a 4 column file (1:Gene name, 2:Scaffold name, 3:Gene start, 4:Gene end) and was generated from *schistosoma\_japonicum.PRJEA34885.WBPS9.canonical\_geneset.gtf*

#### *5.gene-selector.pl*

```

#!/usr/bin/perl
print "finds all genes in a list of window coordinates\n";
print "input are: a list of coordinates ($start $space $end), and a simplified CDS file ($genename
$chrom $start $end)";
print "usage: perl 5.gene-selector.pl windows-with-loss.csv japonicum-gene-coordinates.csv\n";

my $input = $ARGV[0];

```

```

my $ensembl = $ARGV[1];

open (INPUT, "$input");
open (GENES, "$ensembl");
open (RESULTS, ">>$ensembl.Windows.txt");

while ($line = <INPUT>) {
    push (@windows, $line);
}

while ($gline = <GENES>)
{
    chomp $gline;
    chomp $gline;
    $gline =~ s/\n//g;
    ($gene, $chrom, $start, $end)=split(/\t/, $gline);
    if ($gene ne "Gene_ID")
    {
        foreach $window (@windows)
        {
            ($winchrom, $winstart, $winend)=split(/\t/, $window);
            if ($chrom eq $winchrom)
            {
                if (($start>$winstart && $start<$winend) || ($end>$winstart &&
$end<$winend) || ($start<$winstart && $end>$winend))
                {
                    print RESULTS "$gline\n";
                }
            }
            else
            {
            }
        }
    }
}
else {}

}

```

### 6.5 Identification of one-to-one orthologs between *S. japonicum* and *S. mansoni*

The previous step provided us three distinct lists of genes: 70 for 1kb windows, 29 for 5kb windows and 70 for 10kb windows. As those lists overlapped to a small extent, we considered the list of 154 unique genes for subsequent analyses. In order to determine the genomic location of those genes, we established a one-to-one orthology between *S. japonicum* and *S. mansoni* CDS, by running successively *6.blat\_1to1.sh* and the perl script *7.bestreciprocalhit.pl* with CDSjap\_CDSmans.blat.sorted as argument:

#### *6.blat\_1to1.sh*

```

#!/bin/bash
#SBATCH --job-name="blat"
#SBATCH --mem=50G
#SBATCH --time=48:00:00

```

```

#SBATCH --output=2.blat_one-to-one.out

#-# last edit: 30-10-2020
#-# usage: qsub 2.blat_one-to-one.sh
#-# prog required: BLAT_v36x1
#-# description: Align with BLAT

## define variables:
CDS_mans="~/path-to-mansoni-genome/
schistosoma_mansoni.PRJEA36577.WBPS14.CDS_transcripts.fa"
CDS_jap="~/path-to-japonicum-genome/schistosoma_japonicum.PRJEA34885.WBPS9.genomic.fa"

### start

module load blat/20170224

blat -q=dnax -t=dnax -minScore=50 ${CDS_jap} ${CDS_mans} CDSjap_CDSmans.blat

sort -k 10 CDSjap_CDSmans.blat > CDSjap_CDSmans.blat.sorted

### end

```

### ***7.bestreciprocalhit.pl***

```

#!/usr/bin/perl

my $input = $ARGV[0];

system "sort -k 10 $input > $input.sorted";
open (INPUT, "$input.sorted");

open (RESULTS1, ">$input.besthit");

#print RESULTS1 "Qname\tTname\tsimilarity\talignL\tmismatch\tgaps\tQstart\tQend\tTstart\tTend\t
tmatch\tbitscore\n";

$name0="";
$score0=0;
$line0="";

while ($line = <INPUT>) {
($match, $mis, $rep, $N, $Qgapc, $Qgapb, $Tgapc, $Tgapb, $strand, $Qname, $Qsize, $Qstart,
$Qend, $Tname, $Tsize, $Tstart, $Tend, $blockc, $blocksize, $qstarts, $tstarts)=split(/\t/, $line);

    if ($Qname eq $name0)
    {
        if ($match > $score0)
        {
            $name0=$Qname;
            $score0=$match;
            $line0=$line;
        }
        else
        {
        }
    }
    else
    {

```



```

    print RESULTS1 $line0;
    $name0=$Qname;
    $score0=$match;
    $line0=$line;

    }

}

print RESULTS1 $line0;

close (RESULTS1);
close (INPUT);

#system "perl -pi -e 's/^[^0-9].*//gi' $input.besthit";
#system "perl -pi -e 's/1match/match/gi' $input.besthit";
system "perl -pi -e 's/^\n//gi' $input.besthit";

system "sort -k 14 $input.besthit > $input.besthit.sorted2";
open (INPUT2, "$input.besthit.sorted2");

open (RESULTS2, ">$input.bestreciprocal");

#print RESULTS2 "Qname\tTname\tsimilarity\talignL\tmismatch\tgaps\tQstart\tQend\tTstart\tTend\tmatch\tbitscore\n";

$name0="";
$score0=0;
$line0="";

while ($line = <INPUT2>) {
    ($match, $mis, $rep, $N, $Qgapc, $Qgapb, $Tgapc, $Tgapb, $strand, $Qname, $Qsize, $Qstart, $Qend, $Tname, $Tsize, $Tstart, $Tend, $blockc, $blocksize, $qstarts, $tstarts)=split(/\t/, $line);

    if ($Tname eq $name0)
    {
        if ($match > $score0)
        {
            $name0=$Tname;
            $score0=$match;
            $line0=$line;
        }
        else
        {
        }
    }
    else
    {
        print RESULTS2 $line0;
        $name0=$Tname;
        $score0=$match;
        $line0=$line;
    }
}

```

```

}
print RESULTS2 $line0;

system "rm $input.sorted $input.besthit.sorted2 $input.besthit";
system "perl -pi -e 's/^[^0-9].*/gi' $input.bestreciprocal";
system "perl -pi -e 's/1match/match/gi' $input.bestreciprocal";
system "perl -pi -e 's/^\n//gi' $input.bestreciprocal";

close (RESULTS2);
close (INPUT2);

```

The final table summarizing the gene loss in females is named GeneLoss\_FinalTable.xlsx and corresponds to the Supplementary Dataset 18. The genomic location is based on the one-to-one orthology and the mansoni genome annotation *schistosoma\_mansoni.PRJEA36577.WBPS14*. When no ortholog was found, the genomic location was based on the “best location” of the *S. japonicum* scaffold holding this given gene (Picard *et al.*, *elife*, 2018).

## Supplementary Code 7: Estimating the Rates of Evolution of ZW homologs in *S. mansoni*

### 7.1 Getting ORFs

The final *S. mansoni* set had 42 coding candidates, 30 of which were annotated. We used *genewise* to get the open reading frames for the 22 candidates that were not annotated.

```

module load java
module load wise/2.4.1
module load blat

for (( i = 1; i <= 20; i++ ))
do
sed -n "$i"p names_for_genewise.txt | cut -f 1 | sort | uniq | ~/seqtk/seqtk subseq
Final_Set_W_candidates_mansoni.fasta /dev/stdin > "$i"_w.fa

sed -n "$i"p names_for_genewise.txt | cut -f 2 | sort | uniq | ~/seqtk/seqtk subseq
schistosoma_mansoni.PRJEA36577.WBPS14.protein.fa /dev/stdin > "$i"_prot.fa

sed -n "$i"p names_for_genewise.txt | cut -f 3 | sort | uniq | ~/seqtk/seqtk subseq
schistosoma_mansoni.PRJEA36577.WBPS14.CDS_transcripts.fa /dev/stdin > "$i"_z.fa

genewise -cdna "$i"_prot.fa "$i"_w.fa -both > "$i"_w.CDS

```

```

genewise -cdna "$i"_prot.fa "$i"_z.fa -both > "$i"_z.CDS

cat "$i"_w.CDS "$i"_z.fa > "$i"_final_cds.fasta
done

#formatting the annotated candidates
for (( i = 21; i <= 40; i++ ))

do

sed -n "$i"p names_for_genewise.txt | cut -f 1 | sort | uniq | ~/seqtk/seqtk subseq
schistosoma_mansoni.PRJEA36577.WBPS14.CDS_transcripts.fa /dev/stdin > "$i"_w.fa

sed -n "$i"p names_for_genewise.txt | cut -f 3 | sort | uniq | ~/seqtk/seqtk subseq
schistosoma_mansoni.PRJEA36577.WBPS14.CDS_transcripts.fa /dev/stdin > "$i"_z.fa

cat "$i"_w.fa "$i"_z.fa > "$i"_final_cds.fasta
done

```

### names\_for\_genewise.txt

(this is from a *Blat* alignment of the candidates against the mansoni CDS)

```

SM_W_C2035 Smp_165180.1 Smp_165180.1
SM_W_C2123 Smp_302910.1 Smp_302910.1
SM_W_C2223 Smp_200230.1 Smp_200230.1
SM_W_C2253 Smp_082240.1 Smp_082240.1
SM_W_C2311 Smp_190740.1 Smp_190740.1
SM_W_C2357 Smp_006920.1 Smp_006920.1
SM_W_C2377 Smp_020920.2 Smp_336770.1
SM_W_C2383 Smp_318670.1 Smp_006920.1
SM_W_C2387 Smp_019690.1 Smp_019690.1
SM_W_C2389 Smp_320940.2 Smp_158740.1
SM_W_C2397 Smp_320670.1 Smp_169140.1
SM_W_scaffold12 Smp_310950.1 Smp_120320.1
SM_W_scaffold15 Smp_166600.1 Smp_166600.1
SM_W_scaffold16 Smp_317870.1 Smp_022330.1
SM_W_scaffold18 Smp_323380.2 Smp_337410.2
SM_W_scaffold19 Smp_079220.1 Smp_079220.1
SM_W_scaffold3 Smp_324710.1 Smp_092880.1
SM_W_scaffold5 Smp_093100.2 Smp_093100.2
SM_W_scaffold7 Smp_301330.1 Smp_118750.1
SM_W_scaffold8 Smp_007630.1 Smp_007630.1
Smp_045040.1 Smp_045040.1 Smp_316440.1
Smp_146490.1 Smp_146490.1 Smp_319050.1
Smp_303540.2 Smp_303540.2 Smp_031100.1
Smp_308070.1 Smp_308070.1 Smp_324320.1
Smp_312650.1 Smp_312650.1 Smp_093790.1
Smp_318640.1 Smp_318640.1 Smp_139010.1
Smp_318650.1 Smp_318650.1 Smp_340400.1
Smp_318660.1 Smp_318660.1 Smp_174300.1
Smp_318680.1 Smp_318680.1 Smp_125960.1
Smp_318690.1 Smp_318690.1 Smp_031000.1
Smp_318710.1 Smp_318710.1 Smp_158310.1
Smp_320660.1 Smp_320660.1 Smp_332870.1
Smp_320680.1 Smp_320680.1 Smp_169150.1
Smp_324690.1 Smp_324690.1 Smp_022320.1

```

```
Smp_324700.1 Smp_324700.1 Smp_340380.1
Smp_325490.1 Smp_325490.1 Smp_153170.1
Smp_327030.2 Smp_327030.1 Smp_164880.1
Smp_331650.2 Smp_331650.2 Smp_332860.1
Smp_335650.1 Smp_335650.1 Smp_067520.1
Smp_336600.1 Smp_047190.1 Smp_047190.1
```

## 7.2 TranslatorX

The coding sequences were aligned with the TranslatorX package with the “gblocks” option used to obtain alignment blocks.

```
module load muscle
module load gblocks/0.91b
for file in ~/*_final_cds.fasta
do
perl ~/translatorx_vLocal.pl -i ${file} -o ${file}.fa.tx -t T -g "-s"
done
```

## 7.3 KaKs calculator

The dN and dS values were obtained with KaKs\_calculator2.0 as follows:

```
for file in ~/*nt_cleanali.fasta #TranslatorX output
do
perl parseFastalntoAXT.pl ${file}
~/KaKs_Calculator2.0/src/KaKs_Calculator -i ${file}.axt -o ${file}.kaks -m NG -m YN
done
```

# Supplementary Code 8: Estimating the Rates of Evolution of ZW homologs in *S. japonicum*

## 8.1 Genewise

We used genewise to get the open reading frames for our candidates based on the *S. mansoni* protein sequences.

```
module load java
module load wise/2.4.1
module load blat
```

```

for (( i = 1; i <= 48; i++ ))
do

sed -n "$i"p names_for_genewise.txt | cut -f 1 | sort | uniq | ~/seqtk/seqtk subseq
Final_Set_W_Candidates_japonicum.fasta /dev/stdin > "$i"_w.fa

sed -n "$i"p names_for_genewise.txt | cut -f 2 | sort | uniq | ~/seqtk/seqtk subseq
schistosoma_mansoni.PRJEA36577.WBPS14.protein.fa /dev/stdin > "$i"_prot.fa

sed -n "$i"p names_for_genewise.txt | cut -f 3 | sort | uniq | ~/seqtk/seqtk subseq
Final_Set_Z_Candidates_japonicum_07_11_2020.fasta /dev/stdin > "$i"_z.fa

genewise -cdna "$i"_prot.fa "$i"_w.fa -both > "$i"_w.CDS

genewise -cdna "$i"_prot.fa "$i"_z.fa -both > "$i"_z.CDS

cat "$i"_w.CDS "$i"_z.CDS > "$i"_final_cds.fasta
done

```

### names\_for\_genewise.txt

(from blat of *S. japonicum* W-candidates against *S. mansoni* CDS)

```

Sj_W_C10082 Smp_335120.2 TRINITY_DN139669_c0_g1_i3
Sj_W_C10114 Smp_025340.1 Contig12941
Sj_W_C10144 Smp_025360.1 Contig280
Sj_W_C10288 Smp_025510.1 Contig17963
Sj_W_C10290 Smp_025570.1 TRINITY_DN4507_c0_g1_i1
Sj_W_C10320 Smp_076530.1 TRINITY_DN2878_c0_g1_i1
Sj_W_C10324 Smp_135870.1 Contig14966
Sj_W_C10348 Smp_341020.1 TRINITY_DN1083_c0_g1_i1
Sj_W_C10370 Smp_305490.2 Contig3659
Sj_W_C10372 Smp_157720.1 Contig2829
Sj_W_C10410 Smp_166600.1 TRINITY_DN1876_c0_g1_i3
Sj_W_C10422 Smp_157720.1 Contig2829
Sj_W_C10426 Smp_135870.1 Contig14966
Sj_W_C10454 Smp_157750.1 TRINITY_DN6547_c0_g1_i4
Sj_W_C10456 Smp_163380.1 TRINITY_DN126437_c0_g1_i1
Sj_W_C10484 Smp_018220.1 TRINITY_DN4507_c0_g1_i1
Sj_W_C9788 Smp_305490.2 Contig12097
Sj_W_C9802 Smp_135870.1 Contig14966
Sj_W_C9944 Smp_305490.2 TRINITY_DN4100_c0_g1_i5
Sj_W_Contig13 Smp_061920.1 Contig5787
Sj_W_Contig14 Smp_065840.1 TRINITY_DN3602_c0_g1_i13
Sj_W_Contig15 Smp_064800.1 Contig18734
Sj_W_Contig17 Smp_157670.1 TRINITY_DN3218_c0_g1_i1
Sj_W_Contig18 Smp_058650.1 TRINITY_DN233_c0_g1_i11
Sj_W_Contig2 Smp_025560.1 TRINITY_DN2827_c0_g1_i45
Sj_W_Contig23 Smp_157720.1 Contig2829
Sj_W_Contig32 Smp_058650.1 TRINITY_DN233_c0_g1_i11
Sj_W_Contig34 Smp_210500.1 Contig1613
Sj_W_Contig35 Smp_157660.1 TRINITY_DN121342_c0_g1_i1
Sj_W_Contig36 Smp_136070.1 Contig17032
Sj_W_Contig38 Smp_064750.2 TRINITY_DN22475_c0_g1_i1
Sj_W_Contig39 Smp_341050.1 TRINITY_DN852_c0_g1_i15
Sj_W_Contig43 Smp_305490.1 Contig3659
Sj_W_Contig44 Smp_065770.1 Contig12202
Sj_W_Contig49 Smp_019690.1 Contig13148
Sj_W_Contig50 Smp_132020.1 TRINITY_DN7611_c0_g1_i5

```

```

Sj_W_Contig51 Smp_157720.1 TRINITY_DN120212_c0_g1_i1
Sj_W_Contig52 Smp_076560.1 Contig1625
Sj_W_Contig55 Smp_176340.1 Contig6308
Sj_W_Contig56 Smp_337390.2 TRINITY_DN47543_c0_g1_i1
Sj_W_Contig58 Smp_018240.1 TRINITY_DN2542_c0_g1_i1
Sj_W_Contig60 Smp_345630.1 Contig15286
Sj_W_Contig63 Smp_340290.1 Contig16146
Sj_W_Contig64 Smp_335120.1 TRINITY_DN139669_c0_g1_i4
Sj_W_Contig68 Smp_158310.1 TRINITY_DN2031_c1_g1_i2
Sj_W_Contig9 Smp_340500.2 TRINITY_DN71110_c0_g1_i1
Sj_W_scaffold14 Smp_157140.1 TRINITY_DN41888_c0_g1_i1
Sj_W_scaffold21 Smp_157720.1 Contig2829

```

## 8.2 TranslatorX

We aligned the coding sequences using the TranslatorX package with the “gblocks” option used to obtain alignment blocks.

```

module load muscle
module load gblocks/0.91b
for file in ~/*_final_cds.fasta
do
perl ~/translatorx_vLocal.pl -i ${file} -o ${file}.fa.tx -t T -g "-s"
done

```

## 8.3 KaKs calculator

The dN and dS values were obtained with KaKs\_calculator2.0 as follows:

```

for file in ~/*_nt_cleanali.fasta #TranslatorX output
do
perl parseFastaIntoAXT.pl ${file}
~/KaKs_Calculator2.0/src/KaKs_Calculator -i ${file}.axt -o ${file}.kaks -m NG -m YN
done

```

## Supplementary Code 9: *S. mansoni* Transcriptome Curation for OrthoFinder

The steps used to curate the *S. mansoni* transcriptome for Orthofinder can be found below:

```

#merge the single CDS files from genewise:
for file in ~/final_cds/*_final_cds.fasta
do
cat $file >> mansoni_ZW_CDS.fasta
done
#merge the single CDS files from genewise:

```

```

#collapse the transcriptome using SpliceFinder.pl

perl SpliceFinder_2.pl schistosoma_mansoni.PRJEA36577.WBPS14.CDS_transcripts.fa

#use blat to find the copies of the W-candidates in the transcriptome that need to be removed
module load blat

blat -minScore=31 schistosoma_mansoni.PRJEA36577.WBPS14.CDS_transcripts.fa.long
mansoni_ZW_CDS.fasta ZW_vs_trans.blat -t=dnax -q=dnax

#filter for matches > 100 and & mismatch/(match+mismatch)<'0.05'
cat ZW_vs_trans.blat | awk '($1>100 && ($2/($1+$2+0.0000001))<0.05)' > filtered_all.txt
#remove all the transcripts in filtered_all from the collapsed transcriptome by listing all the
transcripts in remove.txt and using the command below
perl -ne 'if(/^>(\S+)){$c=!$i{$1}}$c?print:chomp;$i{$_}=1 if @ARGV' remove.txt
schistosoma_mansoni.PRJEA36577.WBPS14.CDS_transcripts.fa.long >
schistosoma_mansoni_clean_CDS.fasta

#add the w-candidates to the clean collapsed transcriptome
cat schistosoma_mansoni_clean_CDS.fasta mansoni_ZW_CDS.fasta >
schistosoma_mansoni_plus_ZW_orthofinder.fasta

```

## Supplementary Code 10: *S. japonicum* Transcriptome Curation for OrthoFinder

The steps used to curate the *S. japonicum* transcriptome for Orthofinder can be found below:

```

#merge the the single CDS to have a file with only coding Z and W to use for Orthofinder
for file in ~/final_cds/*_final_cds.fasta
do
cat $file >> japonicum_ZW_CDS.fasta
done

#collapse schistosoma_japonicum.PRJEA34885.WBPS14.CDS_transcripts.fa using SpliceFinder_2.pl
perl SpliceFinder_2.pl schistosoma_japonicum.PRJEA34885.WBPS14.CDS_transcripts.fa

module load blat
#blat japonicum_ZW_CDS.fasta against the collapsed transcriptome
blat -minScore=31 schistosoma_japonicum.PRJEA34885.WBPS14.CDS_transcripts.fa.long
japonicum_ZW_CDS_12_04_2021.fasta ZW_vs_trans.blat -t=dnax -q=dnax

#filter for matches > 100 and & mismatch/(match+mismatch)<'0.05'
cat ZW_vs_trans.blat | awk '($1>100 && ($2/($1+$2+0.0000001))<0.05)' > filtered_all.txt

#remove all the transcripts in filtered_all from the collapsed transcriptome by listing all the
transcripts in remove.txt and using the command below

perl -ne 'if(/^>(\S+)){$c=!$i{$1}}$c?print:chomp;$i{$_}=1 if @ARGV' remove.txt
schistosoma_japonicum.PRJEA34885.WBPS14.CDS_transcripts.fa.long >
schistosoma_japonicum_clean_CDS.fasta

#add japonicum_ZW_CDS.fasta to the clean collapsed transcriptome

```

```
cat schistosoma_japonicum_clean_CDS.fasta japonicum_ZW_CDS.fasta >
schistosoma_japonicum_plus_ZW_orthofinder.fasta
```

## Supplementary Code 11: Running OrthoFinder

```
#translate the transcriptomes
perl GetLongestAA_v1_July2020.pl schistosoma_japonicum_plus_ZW_orthofinder.fasta

perl GetLongestAA_v1_July2020.pl schistosoma_mansoni_plus_ZW_orthofinder.fasta

perl GetLongestAA_v1_July2020.pl clonorchis_sinensis.PRJNA386618.WBPS14.CDS_transcripts.fa

#place all of the transcriptomes in one file and run OrthoFinder
~/orthofinder/OrthoFinder/orthofinder -f ~/schistosoma
```

## Supplementary Code 12: *S. mansoni* Transcriptome Curation for Kallisto

Steps used to curate the *S. mansoni* transcriptome for the expression analysis using Kallisto:

```
#concatenate the final z and w candidates.
cat Final_Set_W_candidates_mansoni.fasta Final_Set_Z_candidates_mansoni.fasta >
Final_ZW_candidates_mansoni.fasta

#use blat to find the copies in the transcriptomes that need to be removed
module load java
module load blat
blat -minScore=31 schistosoma_mansoni.PRJEA36577.WBPS14.CDS_transcripts.fa.long
Final_ZW_candidates_mansoni.fasta ZW_vs_trans.blatt -t=dnax -q=dnax

#filter for matches > 100 and & mismatch/(match+mismatch)<'0.05'
cat ZW_vs_trans.blatt | awk '($1>100 && ($2/($1+$2+0.00000001))<0.05)' > filtered_all.txt

#remove all the transcripts in filtered_all from the collapsed transcriptome by listing all the
transcripts in remove.txt and using the command below

perl -ne 'if(/^>(\S+)/){$c=!${1}}$c?print:chomp;${1}_=1 if @ARGV' remove.txt
schistosoma_mansoni.PRJEA36577.WBPS14.CDS_transcripts.fa.long >
schistosoma_mansoni_clean_CDS.fasta

#add the Final_ZW_candidates_mansoni.fasta to the clean collapsed transcriptome
cat schistosoma_mansoni_clean_CDS.fasta Final_ZW_candidates_mansoni.fasta >
schistosoma_mansoni_CDS_Kallisto.fasta
```



## Supplementary Code 13: *S. japonicum* Transcriptome Curation for Kallisto

Steps used to curate the *S. japonicum* transcriptome for the expression analysis:

```
#concatenate the final z and w candidates.
cat Final_Set_W_Candidates_japonicum.fasta Final_Set_Z_Candidates_japonicum.fasta >
Final_Set_ZW_Candidates_japonicum.fasta

#use blat to find the copies in the transcriptomes that need to be removed
module load java
module load blat
blat -minScore=31 schistosoma_japonicum.PRJEA34885.WBPS14.CDS_transcripts.fa.long
Final_Set_ZW_Candidates_japonicum.fasta ZW_vs_clean_trans.blatt -t=dnax -q=dnax

#filter for matches > 100 and & mismatch/(match+mismatch)<'0.05'
cat ZW_vs_clean_trans.blatt | awk '($1>100 && ($2/($1+$2+0.0000001))<0.05)' > filtered_all.txt

#remove all the transcripts in filtered_all from the collapsed transcriptome by listing all the
transcripts in remove.txt and using the command below

perl -ne 'if(/^>(\S+)/){$c=!${i{$1}};$c?print:chomp;${i{$1}}=1 if @ARGV' remove.txt
schistosoma_japonicum.PRJEA34885.WBPS14.CDS_transcripts.fa.long >
schistosoma_japonicum_clean_CDS.fasta

#add the Final_Set_ZW_Candidates_japonicum.fasta to the clean collapsed transcriptome
cat schistosoma_japonicum_clean_CDS.fasta Final_Set_ZW_Candidates_japonicum.fasta >
schistosoma_japonicum_CDS_Kallisto.fasta
```

## Supplementary Code 14: Expression analysis with Kallisto

### 14.1 Expression analysis in *S. mansoni*

#### 1.kallisto\_index\_mans.sh

The curated *S. mansoni* transcriptome was indexed for subsequent Kallisto analysis.

```
#!/bin/bash

# OPTIONS

#SBATCH --job-name="kallisto_index_mans"
#SBATCH --output=kallisto_index_mans.out
#SBATCH --mem=8G
#SBATCH --time=24:00:00

# MORE INFOS

#-# last edit: 10-05-2021
#-# usage: qsub 1.kallisto_index_mans.sh
#-# prog required: kallisto/0.43.1
#-# description: kallisto is a program for quantifying abundances of transcripts from bulk and single-
cell RNA-Seq data, or more generally of target sequences using high-throughput sequencing reads.
It is based on the novel idea of pseudoalignment for rapidly determining the compatibility of reads
with targets, without the need for alignment.
#-# more info here: https://pachterlab.github.io/kallisto/about.html

### START
```

```

TRANSCRIPTOME=~"/path-to-mansoni-curated-transcriptome/
schistosoma_mansoni_CDS_Kallisto.fasta"
OUF=~"/path-to-mansoni-kallisto-output"

mkdir $OUF
cd $OUF

module load kallisto/0.43.1

# Create index
kallisto index -i $OUF/transcripts.idx $TRANSCRIPTOME

### END

```

## ***2.slurm-script-for-siliconer.sh***

Bash script for launching Siliconer perl script, and allowing to feed the table containing the list of libraries. It is shown below for *3.Siliconer\_mans\_SRR.pl*, but was similarly applied for *4.Siliconer\_mans\_ERR.pl* and *6.Siliconer\_jap.pl*

```

#!/bin/bash

#SBATCH --job-name="kallisto_mans_SRR"
#SBATCH --output=kallisto_mans_SRR.out
#SBATCH --mem=50G
#SBATCH --time=72:00:00

#Input with the library list: RUNlist.txt is a text file with a library number per line

mkdir ~/path-to-mansoni-kallisto-output/KalFiles #creating output folder
module load SRA-Toolkit/2.8.1-3
module load kallisto/0.43.1

#job
srun perl 3.Siliconer_mans_SRR.pl RUNlist.txt

```

## ***3.Siliconer\_mans\_SRR.pl***

Script allowing the automatized download and Kallisto analysis for a given list of libraries. If single-end reads, the fragment size should be adapted on the Kallisto command line! For mansoni SRR libraries used here: [-l 400 -s 40]

```

#!/usr/bin/perl

my $list = $ARGV[0];
open (INPUT, "$list") or die "can't find $input";
while ($run = <INPUT>)
    {
    chomp $run;
    print "$run\n";

### 1. Download fastq files
    #first check if the Kallisto folder already exists
    $filename = "KalFiles/$run";
    if (-e $filename)
        {

```

```

        print "$filename exists\n";
    }
    else
    {
        #download only the first 30 million reads of each file so that we don't wait forever
when there are huge ones
        system "fastq-dump --split-files --skip-technical $run";

### 2. Run Kallisto
        #check if XXX_2 exists
        $filename2="$run\_2.fastq";
        if (-e $filename2)
        {
            #if yes
            system "kallisto quant -t 16 -i
~/path-to-mansoni-kallisto-output/transcripts.idx -o KalFiles/$run -b 100 $run\_1.fastq $run\_2.fastq";
        }
        else
        {
            #if no
            print "$run is single-end\n";
            system "kallisto quant -t 16 -i
~/path-to-mansoni-kallisto-output/transcripts.idx -o KalFiles/$run -b 100 --single -l 400 -s 40 $run\_1.fastq";
        }

### 3. remove file
        system "rm $run\_1.fastq $run\_2.fastq";
    }
}

```

#### ***4.Siliconer\_mans\_ERR.pl***

Script allowing the automatized download and Kallisto analysis for a given list of libraries

If single-end reads, the fragment size should be adapted on the Kallisto command line! For mansoni ERR libraries used here: [-l 180 -s 20]

```

#!/usr/bin/perl

my $list = $ARGV[0];
open (INPUT, "$list") or die "can't find $input";

while ($run = <INPUT>)
{
    chomp $run;
    print "$run\n";
### 1. Download fastq files
    #first check if the Kallisto folder already exists
    $filename = "KalFiles/$run";
    if (-e $filename)
    {
        print "$filename exists\n";
    }
    else
    {
        #download only the first 30 million reads of each file so that we don't wait forever

```

```

when there are huge ones
    system "fastq-dump --split-files --skip-technical $run";

### 2. Run Kallisto
    #check if XXX_2 exists
    $filename2="$run\_2.fastq";
    if (-e $filename2)
    {
        #if yes
        system "kallisto quant -t 16 -i
~/path-to-mansoni-kallisto-output/transcripts.id -o KalFiles/$run -b 100 $run\_1.fastq $run\_2.fastq";
    }
    else
    {
        #if no
        print "$run is single-end\n";
        system "kallisto quant -t 16 -i
~/path-to-mansoni-kallisto-output/transcripts.id -o KalFiles/$run -b 100 --single -l 180 -s 20 $run\_1.fastq";
    }

### 3. remove file
    system "rm $run\_1.fastq $run\_2.fastq";
}

```

## 14.2 Expression analysis in *S. japonicum*

### 5.kallisto\_index\_jap.sh

The curated *S. japonicum* transcriptome was indexed for subsequent Kallisto analysis.

```

#!/bin/bash

# OPTIONS

#SBATCH --job-name="kallisto_index_jap"
#SBATCH --output=kallisto_index_jap.out
#SBATCH --mem=8G
#SBATCH --time=24:00:00

# MORE INFOS

#-# last edit: 10-05-2021
#-# usage: qsub 5.kallisto_index_jap.sh
#-# prog required: kallisto/0.43.1

### START

TRANSCRIPTOME="~/path-to-japonicum-curated-transcriptome/
schistosoma_japonicum_CDS_Kallisto.fasta"
OUF="~/path-to-japonicum-kallisto-output"

mkdir $OUF
cd $OUF

module load kallisto/0.43.1

```

```

# Create index
kallisto index -i $OUF/transcripts.idx $TRANSCRIPTOME
### END

```

## 6. *Siliconer\_jap.pl*

Script allowing the automatized download and Kallisto analysis for a given list of libraries

```

#!/usr/bin/perl

my $list = $ARGV[0];
open (INPUT, "$list") or die "can't find $input";

while ($run = <INPUT>)
{
    chomp $run;
    print "$run\n";
### 1. Download fastq files
    #first check if the Kallisto folder already exists
    $filename = "KalFiles/$run";
    if (-e $filename)
    {
        print "$filename exists\n";
    }
    else
    {
        #download only the first 30 million reads of each file so that we don't wait forever
        when there are huge ones
        system "fastq-dump --split-files --skip-technical $run";

### 2. Run Kallisto

        #check if XXX_2 exists
        $filename2="$run\_2.fastq";
        if (-e $filename2)
        {
            #if yes
            system "kallisto quant -t 16 -i
~/path-to-japonicum-kallisto-output/transcripts.idx -o KalFiles/$run -b 100 $run\_1.fastq $run\_2.fastq";
        }
        else
        {
            #if no
            print "$run is single-end\n";
            system "kallisto quant -t 16 -i
~/path-to-japonicum-kallisto-output/transcripts.idx -o KalFiles/$run -b 100 --single -l 180 -s 20 $run\_1.fastq";
        }

### 3. remove file
        system "rm $run\_1.fastq $run\_2.fastq";
    }
}

```
